# Supplementary material for: The origin of bladder cancer from mucosal field effects
Source: PubMed Central journal article supplement — iScience. 2022 Jun 7;25(7):104551. doi: 10.1016/j.isci.2022.104551 (PMC9209726; doi:10.1016/j.isci.2022.104551), 2022-06-07
Supplement: mmc1.pdf [file mmc1.pdf]

## **Supplemental information**

### **The origin of bladder cancer**

#### **from mucosal field effects**

**Jolanta Bondaruk, Roman Jaksik, Ziqiao Wang, David Cogdell, Sangkyou Lee, Yujie Chen, Khanh Ngoc Dinh, Tadeusz Majewski, Li Zhang, Shaolong Cao, Feng Tian, Hui Yao, Paweł Kuś, Huiqin Chen, John N. Weinstein, Neema Navai, Colin Dinney, Jianjun Gao, Dan Theodorescu, Christopher Logothetis, Charles C. Guo, Wenyi Wang, David McConkey, Peng Wei, Marek Kimmel, and Bogdan Czerniak**

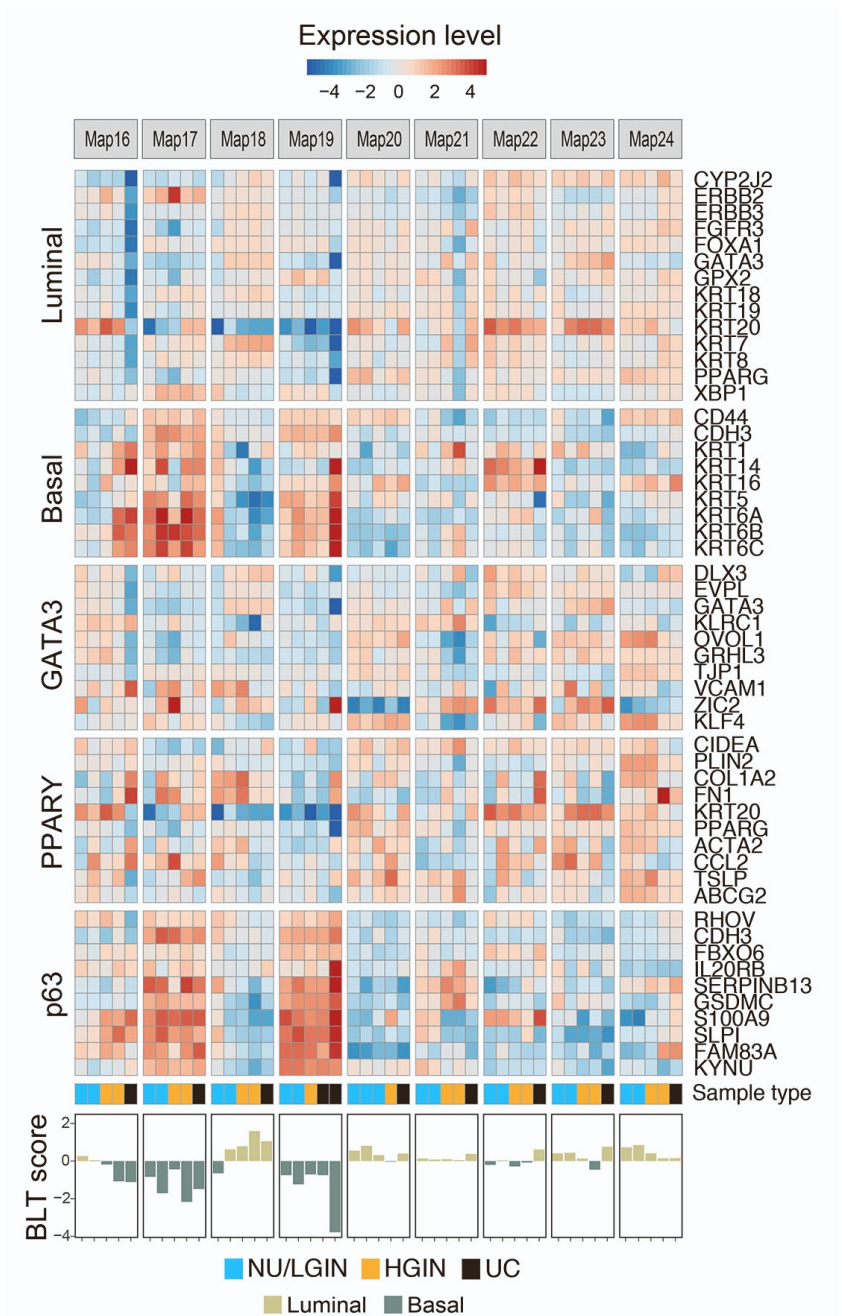

**Figure S1. Expression analysis of selected mucosal samples from nine cystectomies corresponding to microscopically normal urothelium (NU), low-grade intraurothelial neoplasia (LGIN), high-grade intraurothelial neoplasia (HGIN), and urothelial carcinoma (UC), related to Figure 1.** Gene expression profiling of luminal and basal markers was performed, and it was supplemented by analysis of selected target genes of the luminal transcription factors GATA3 and PPAR $\gamma$  as well as the basal transcription factor p63. Quantitative assessment of the luminal and basal phenotypes was performed using BLT scores. Two cystectomy samples identified as luminal (map 24) and basal (map 19) samples were selected for whole-organ multiplatform genomic profiling.

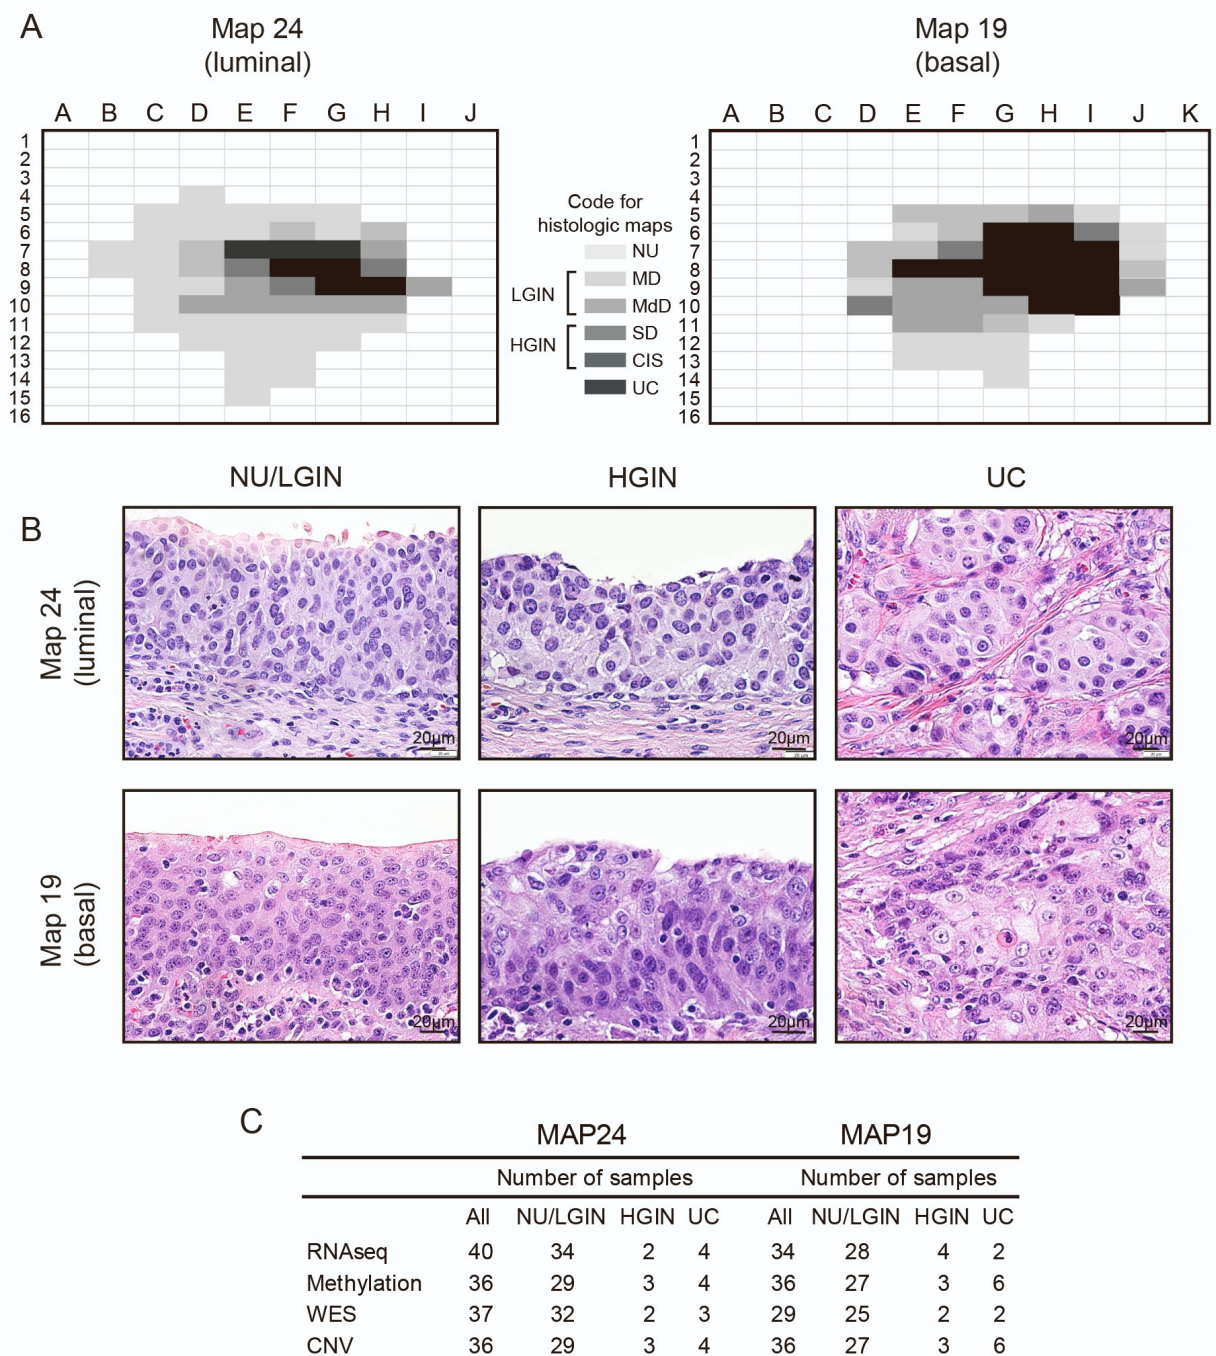

**Figure S2. Preparations of whole-organ histologic maps and the summary of their multi-platform genomic characterization, related to Figure 1. (A)** Whole-organ histologic maps prepared by sampling of the entire mucosa and the geographic coordinates of individual mucosal samples selected for multi-platform genomic profiling. **(B)** Representative microscopic images in maps 24 and 19 corresponding to NU/LGIN, HGIN, and UC. **(C)** Summary of multi-platform genomic profiling of individual samples of maps 24 and 19.



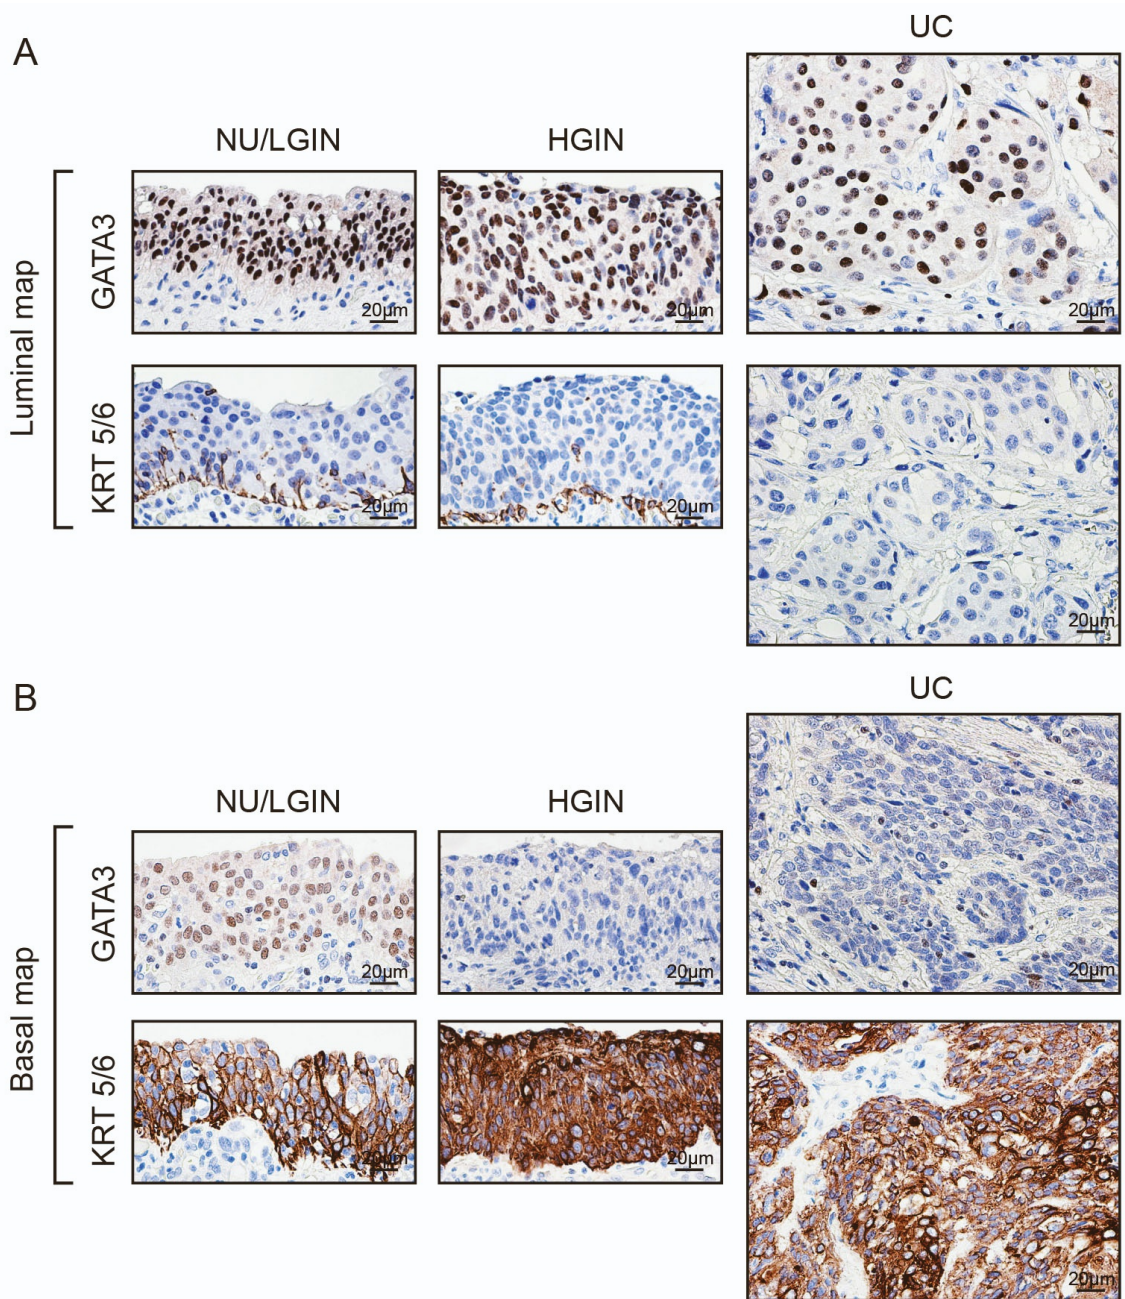

**Figure S3. Immunohistochemical analyses of signature luminal (GATA3) and basal (KRT5/6) markers in the progression of neoplasia from mucosal field effects, related to Figure 1. (A)** Expression pattern of GATA3 and KRT5/6 in representative samples corresponding to NU/LGIN, HGIN, and UC in the luminal map (map 24). **(B)** Expression pattern of GATA3 and KRT5/6 in representative samples corresponding to NU/LGIN, HGIN, and UC in the basal map (map 19).



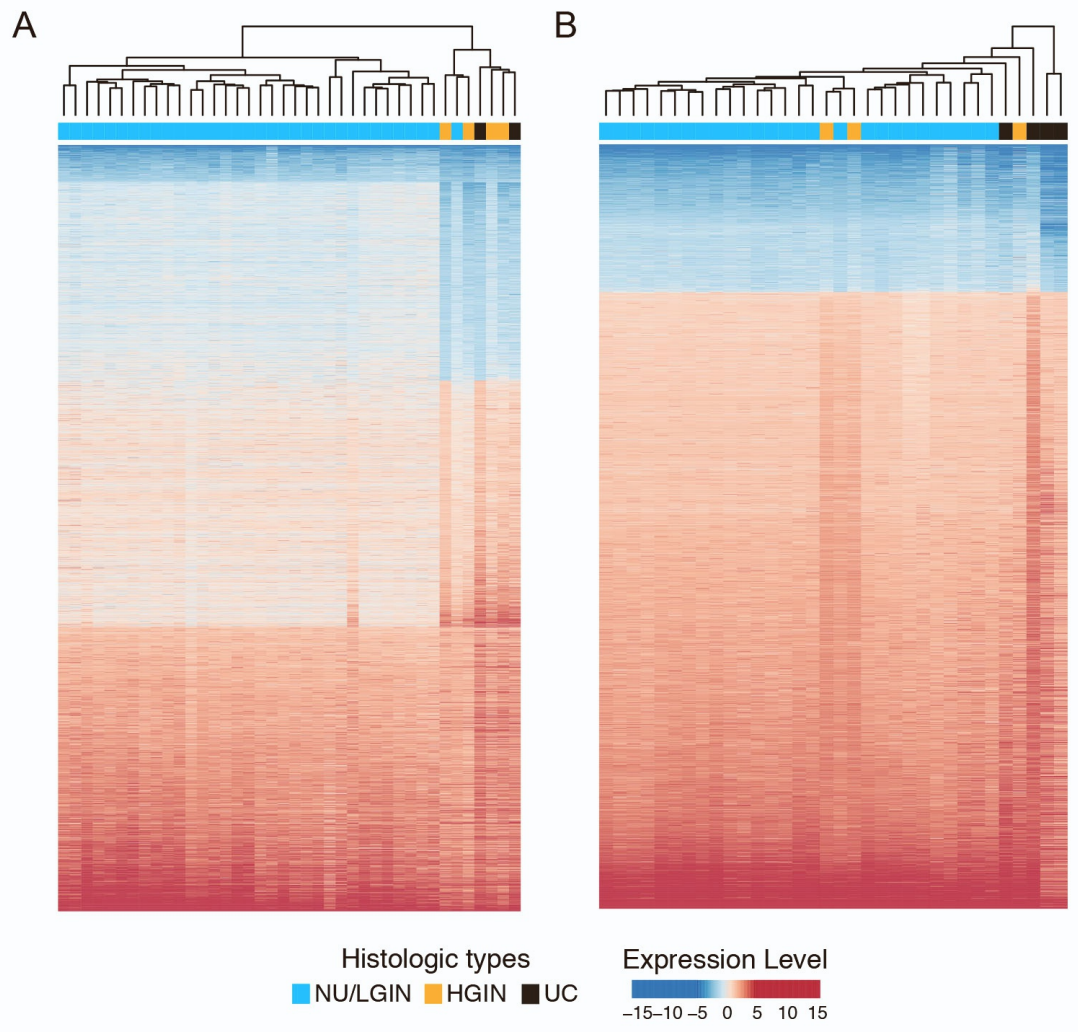

**Figure S4. Gene expression changes in evolution of bladder cancer from field effects along the luminal and basal tracks, related to Figure 2. (A)** Heat map showing the expression patterns of genes in a cystectomy specimen with luminal cancer (map 24). **(B)** Heat map showing the expression patterns of genes in a cystectomy specimen with basal cancer (map 19).

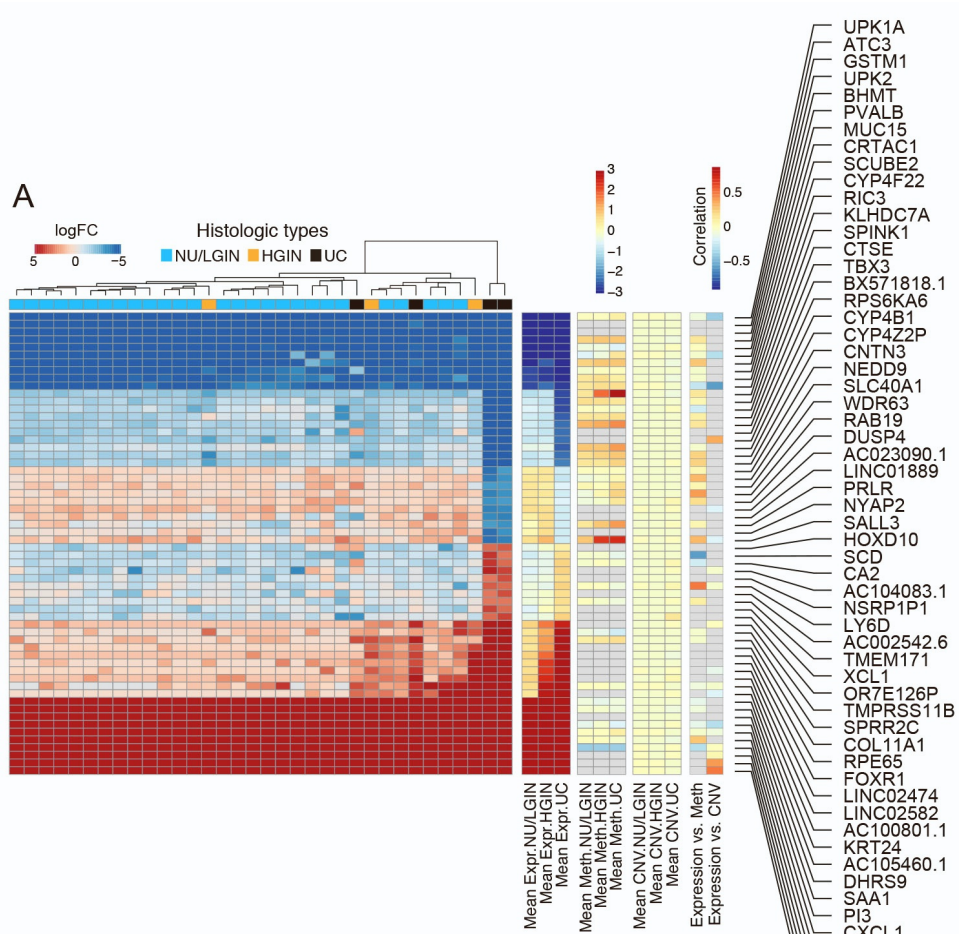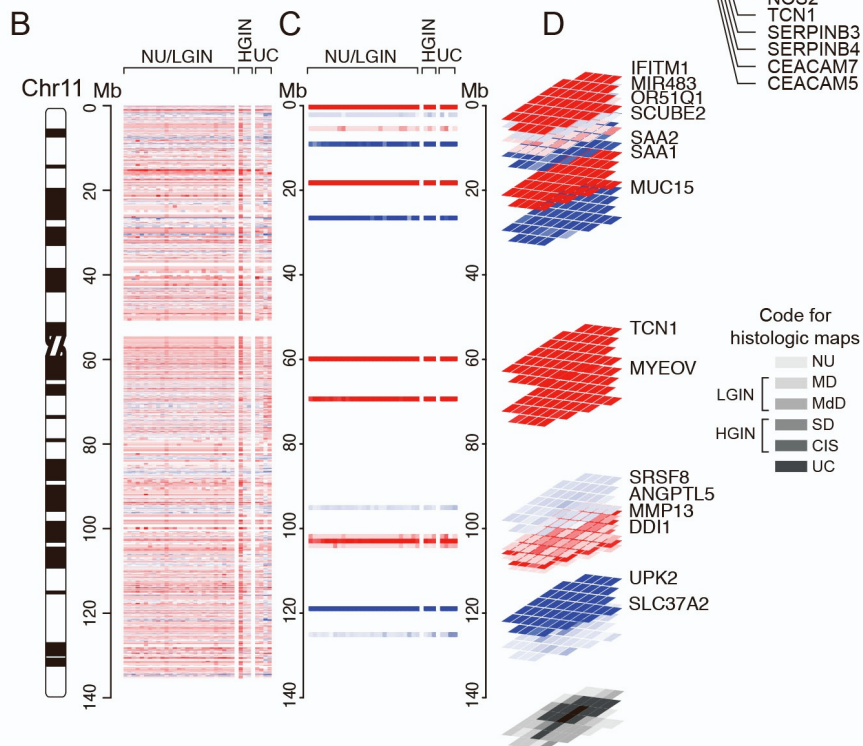

**Figure S5. Evolution of expression changes from field effects through HGIN to UC in cancer developing along the basal track in map 19, related to Figure 2. (A)** Hierarchical clustering of the 60 most downregulated and overexpressed genes showing monotonic expression changes in samples of NU/LGIN through HGIN to UC, HGIN and UC, and UC only. **(B)** Whole-organ expression map for chromosome 11 showing a chromosomal diagram and the expression pattern for genes in individual samples from a cystectomy specimen classified as NU/LGIN, HGIN, and UC. **(C)** Expression pattern for downregulated and overexpressed genes with monotonic changes in NU/LGIN, HGIN, and UC. **(D)** 3D pattern of downregulated and overexpressed genes in the whole-organ map of a cystectomy sample filtered as shown in **C**.



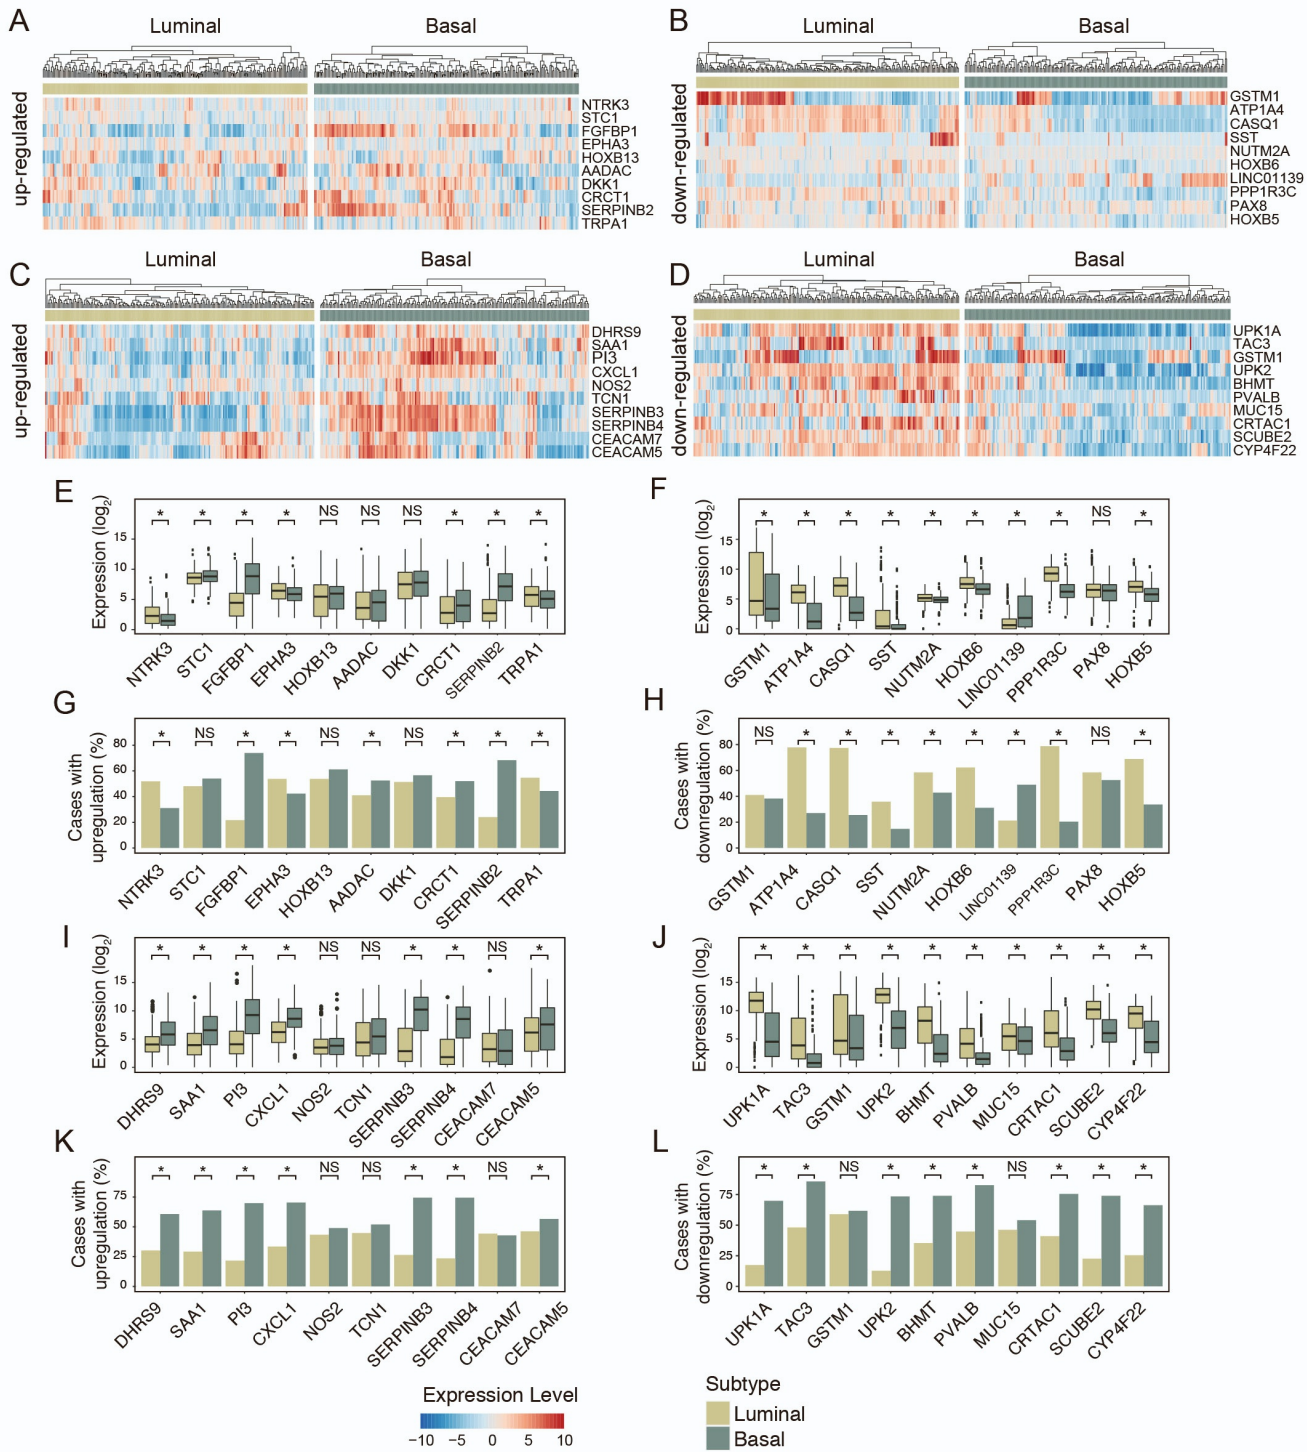

**Figure S6. Expression patterns for the 10 most overexpressed and downregulated genes identified in the early field effects and validated in the TCGA cohort, related to Figure 2. (A)** Expression pattern for the 10 most upregulated genes identified in the field effects in a luminal map and validated in the TCGA cohort. **(B)** Expression pattern for the 10 most downregulated genes identified in the field effects in a luminal map and validated in the TCGA cohort. **(C)** Expression pattern for the 10 most upregulated genes identified in the field effects in a basal map and validated in the TCGA cohort. **(D)** Expression pattern for the 10 most downregulated genes identified in the field effects in a basal map and validated in the TCGA cohort. **(E)** The box plot analysis of expression levels for the 10 most upregulated genes identified in the field effects in a luminal map and validated in the TCGA cohort. **(F)** The box plot analysis of expression levels for the 10 most downregulated genes identified in the field effects in a luminal map and validated in the TCGA cohort. **(G)** The proportion of luminal and basal bladder cancer cases with upregulation of the 10 most upregulated genes identified in a luminal map and validated in the TCGA cohort. **(H)** The proportion of luminal and basal bladder cancer cases with downregulation of the 10 most downregulated genes identified in a luminal map and validated in the TCGA cohort. **(I)** The box plot analysis of expression levels for the 10 most upregulated genes identified in the field effects in a basal map and validated in the TCGA cohort. **(J)** The box plot analysis of expression levels for the 10 most downregulated genes identified in the field effects in a basal map and validated in the TCGA cohort. **(K)** The proportion of luminal and basal bladder cancer cases with upregulation of the 10 most upregulated genes identified in a basal map and validated in the TCGA cohort. **(L)** The proportion of luminal and basal bladder cancer cases with downregulation of the 10 most downregulated genes in a basal map and validated in the TCGA cohort. Asterisks indicate statistically significant ( $p$  value  $<0.05$ ) difference based on Wilcoxon rank-sum test (Panels E, F, I and J) and chi-squared test (Panels G, H, K and L); NS, not significant difference ( $p$  value  $\geq 0.05$ ).

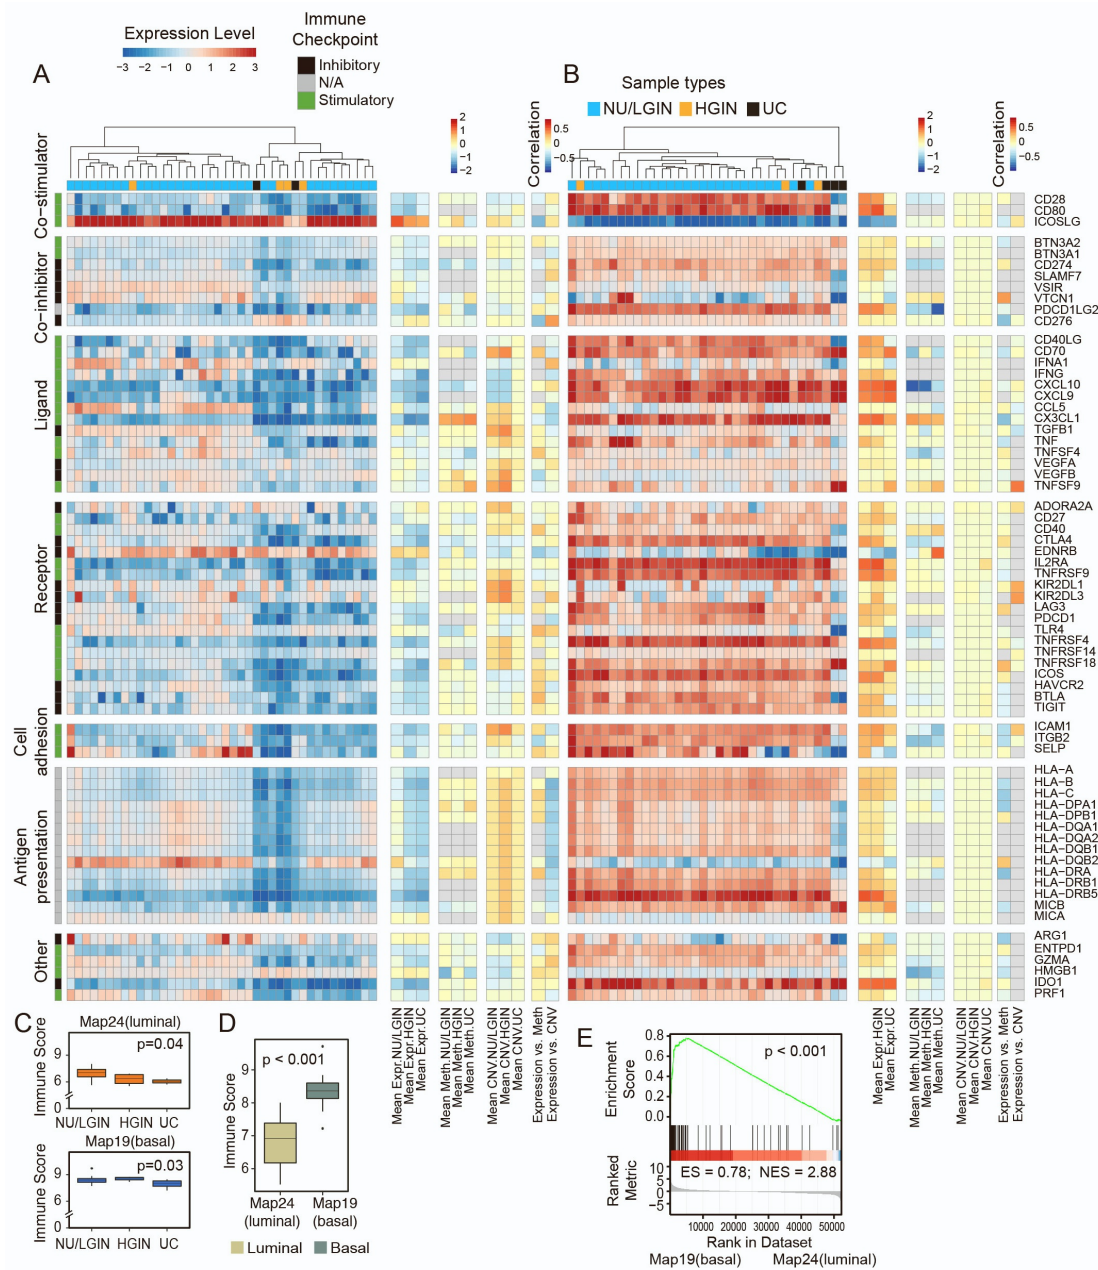

**Figure S7. The immune microenvironment based on the expression of immune-regulatory genes in the evolution of bladder cancer along the luminal and basal tracks, related to Figure 4. (A)** Expression pattern for immune-regulatory genes in mucosal samples from a cystectomy specimen with luminal cancer. **(B)** Expression pattern for immune-regulatory genes in mucosal samples from a cystectomy specimen with basal cancer. Pearson's correlation coefficients are shown. **(C)** Box plots of immune regulatory genes calculated using their expression profiles in **A** and **B** of map 24 (top) and map 19 (bottom) for subsets of samples classified as NU/LGIN, HGIN, and UC. **(D)** Comparison of immune regulatory gene scores for luminal (map 24) and basal (map 19) cancers. **(E)** GSEA for immune regulatory genes in map 24 (luminal) and map 19 (basal). For (C) and (D) p values were calculated using Kruskal-Wallis test.



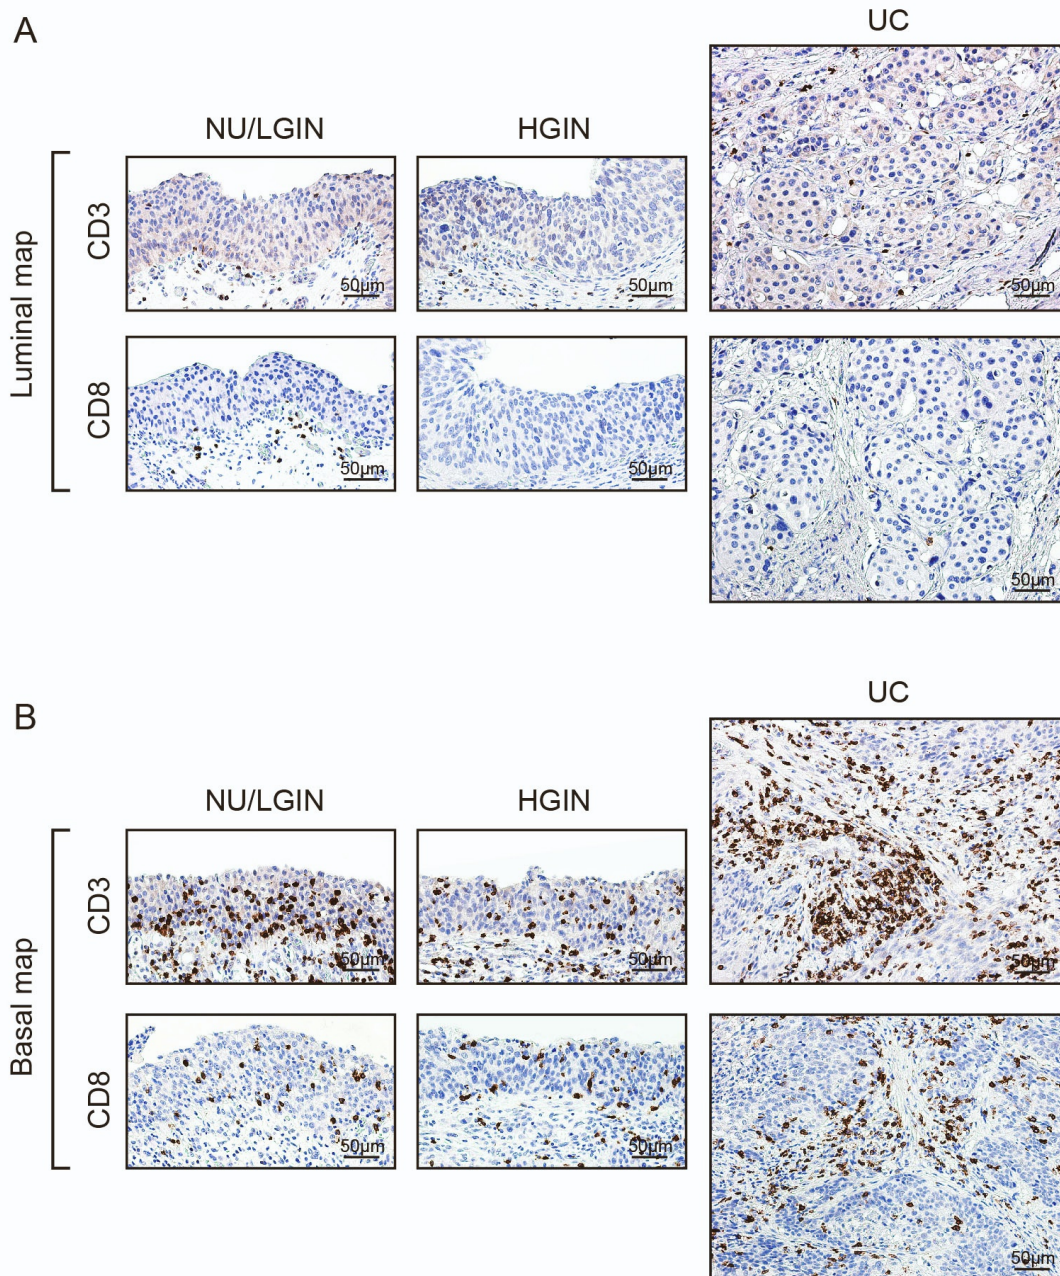

**Figure S8. Immunohistochemical expression of CD3 and CD8 T lymphocytes in evolution of neoplasia from mucosal field effects, related to Figure 4. (A)** The absence of CD3 and CD8 lymphocytic infiltrates in representative samples of NU/LGIN, HGIN, and UC in the luminal map (map24). **(B)** Brisk lymphocytic CD3 and CD8 lymphocytic infiltrate in representative samples of NU/LGIN, HGIN, and UC in the basal map (map 19).

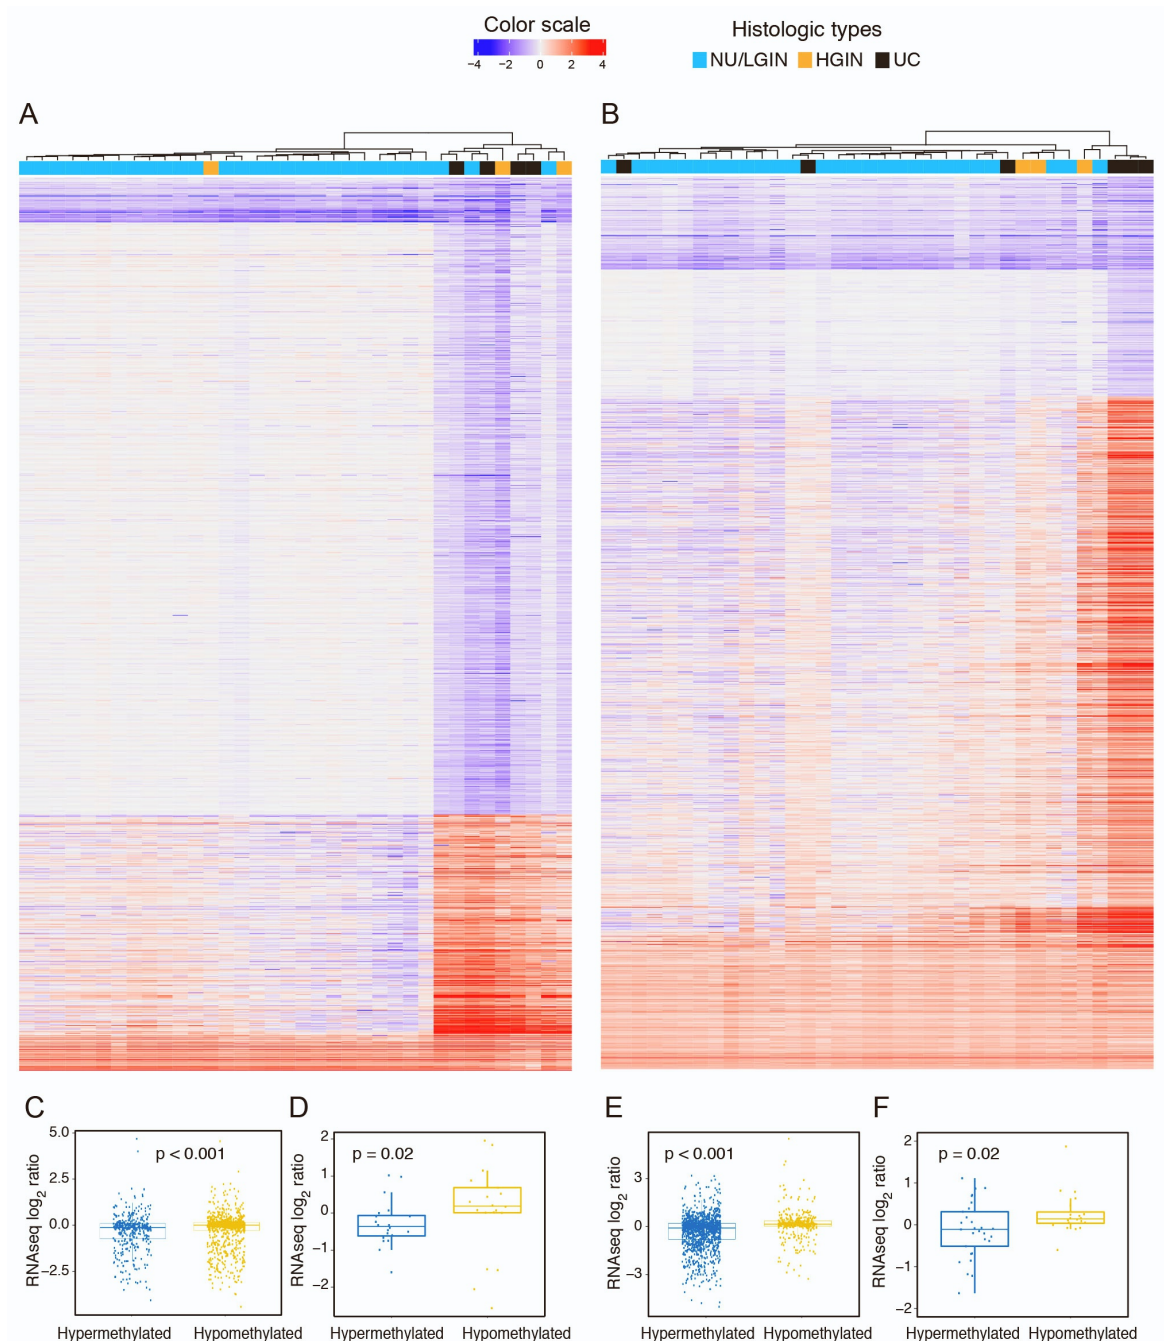

**Figure S9. Gene methylation changes in bladder cancer evolving from field effects along the luminal and basal tracks, related to Figure 5. (A)** Heat map of the methylation patterns for genes in a cystectomy specimen with luminal cancer in map 24. **(B)** Heat map of the methylation patterns for genes in a cystectomy specimen with basal cancer in map 19. **(C)** Box plot analysis of the expression levels of hypermethylated and hypomethylated genes in the luminal map (map 24). **(D)** Box plot analysis of top monotonic dysmethylated genes in the luminal map (map 24). **(E)** Box plot analysis of the expression levels of hypermethylated and hypomethylated genes in the basal map (map 19). **(F)** Box plot analysis of top monotonic dysmethylated genes in the basal map (map 19). For (C), (D), (E) and (F) p values were calculated using Wilcoxon test.



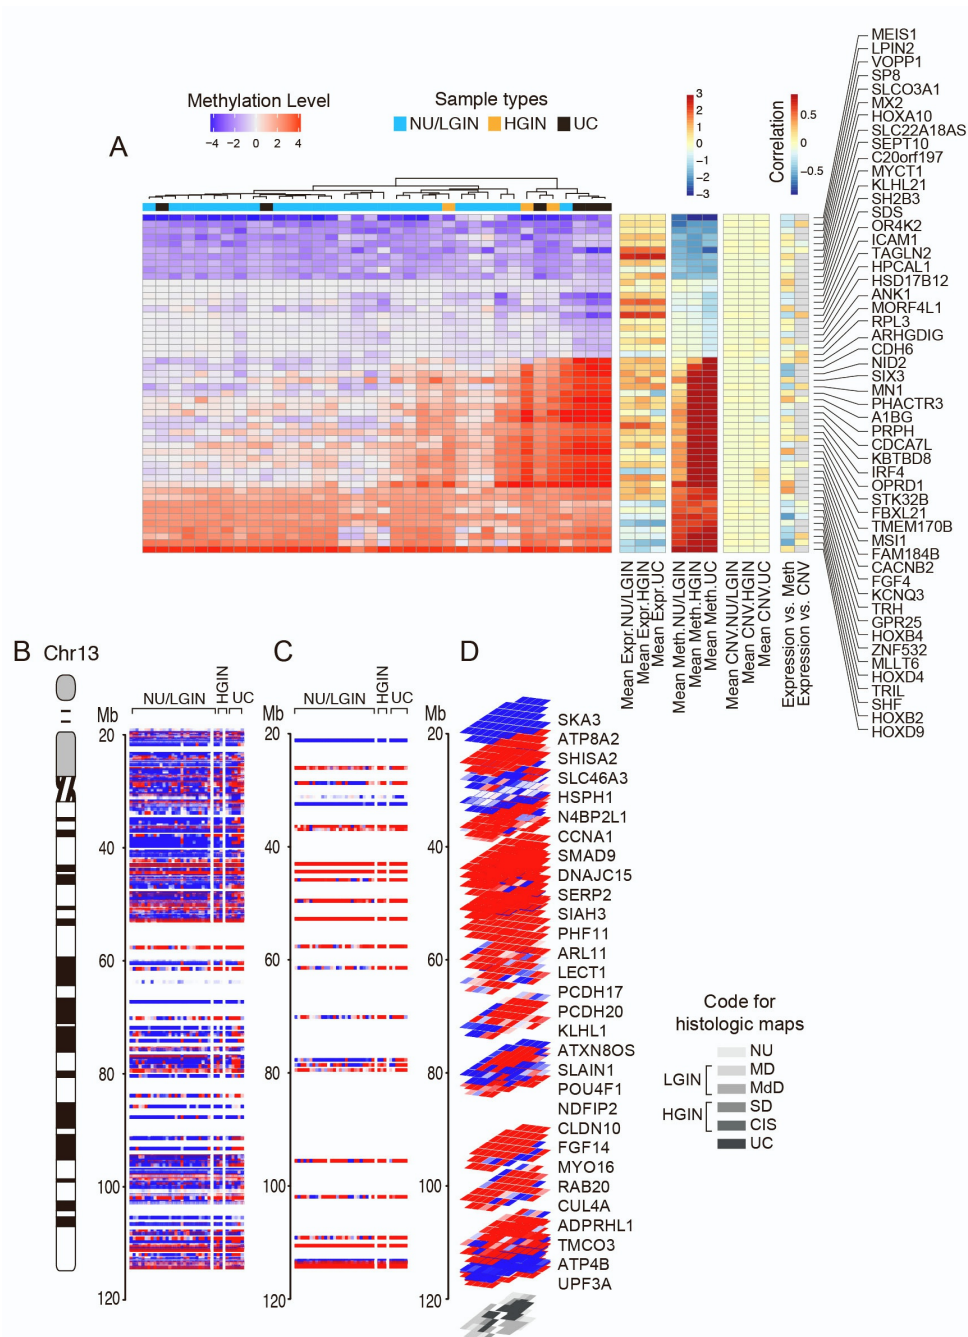

**Figure S10. Evolution of methylation changes in development of bladder cancer from field effects through HGIN to UC along the basal track in map 19, related to Figure 5. (A)** Hierarchical clustering of the 52 most hypomethylated and hypermethylated genes with monotonic expression changes in samples of NU/LGIN through HGIN to UC, HGIN and UC, and UC only. Pearson's correlation coefficients are shown. **(B)** Whole-organ expression map for chromosome 13 showing a chromosomal diagram and methylation pattern for genes in individual samples from a cystectomy specimen classified as NU/LGIN, HGIN, and UC. **(C)** Methylation pattern for hypomethylated and hypermethylated genes with monotonic methylation changes involving NU/LGIN, HGIN, and UC. **(D)** 3D pattern of hypomethylated and hypermethylated genes as it relates to the whole-organ map of a cystectomy sample filtered as shown in **C**.



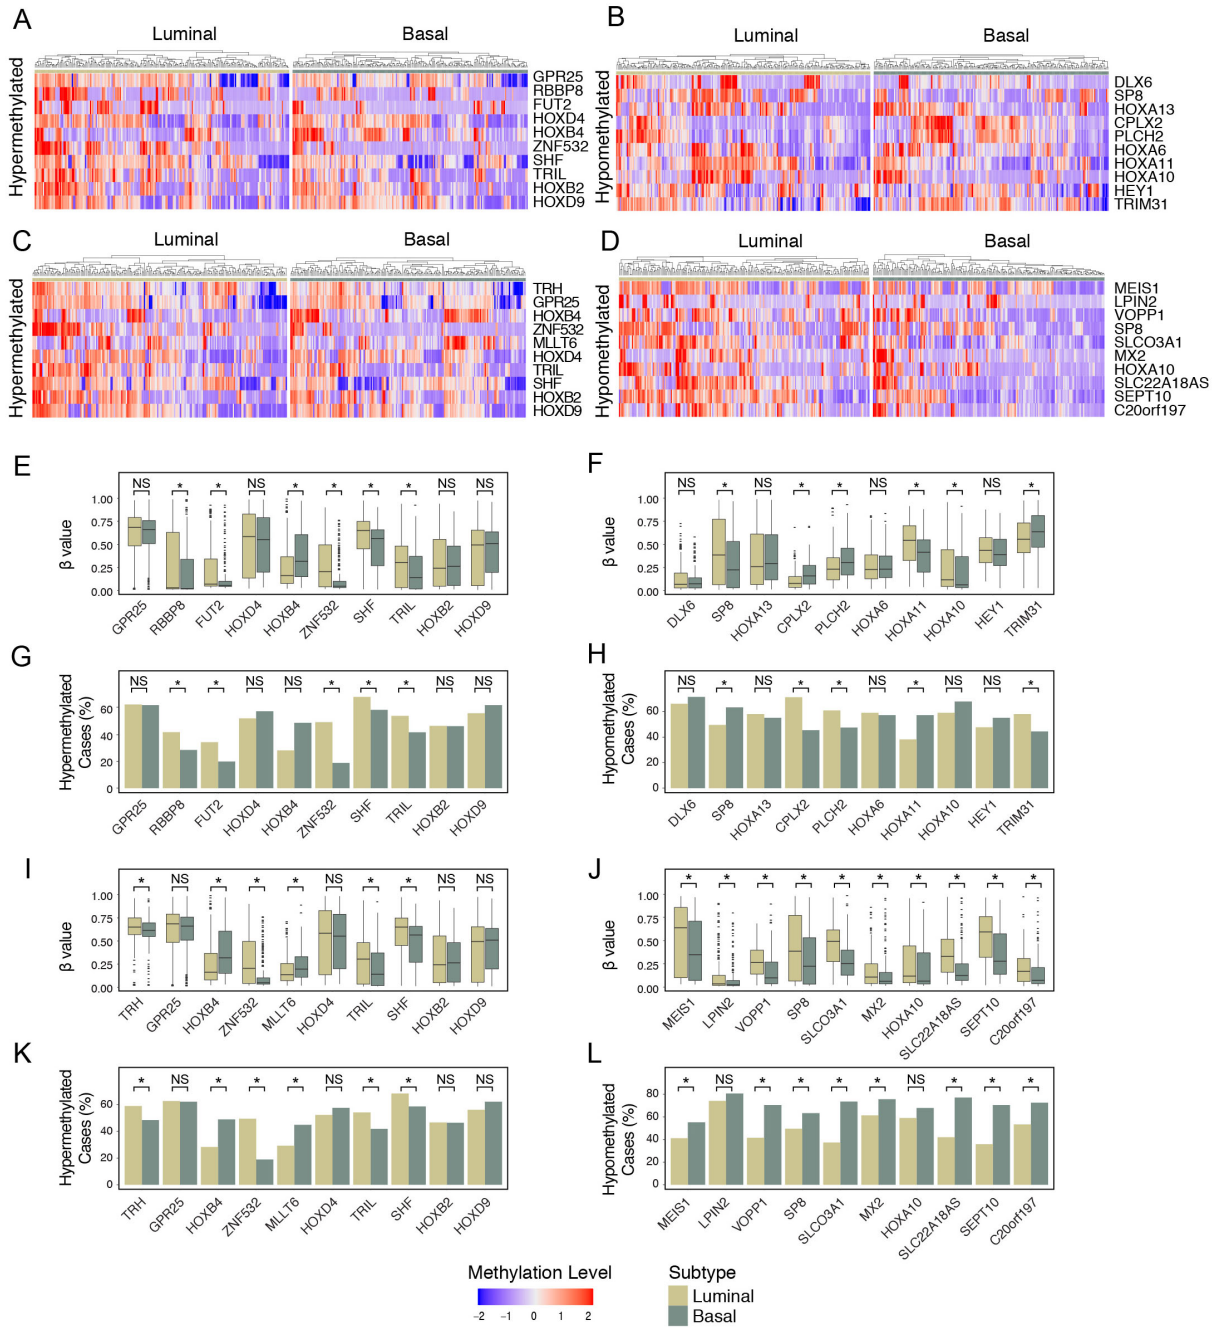

**Figure S11. Methylation patterns for the 10 most hypermethylated and hypomethylated genes identified in the early field effects in the luminal and basal maps and validated in the TCGA cohort, related to Figure 5. (A)** Methylation pattern for the 10 most hypermethylated genes identified in the field effects in a luminal map and validated in the TCGA cohort. **(B)** Methylation pattern for the 10 most hypomethylated genes identified in the field effects in a luminal map and validated in the TCGA cohort. **(C)** Methylation pattern for the 10 most hypermethylated genes identified in the field effects in a basal map and validated in the TCGA cohort. **(D)** Methylation pattern for the 10 most hypomethylated genes identified in the field effects in a basal map and validated in the TCGA cohort. **(E)** The box plot analysis of methylation levels for the 10 most hypermethylated genes identified in the field effects in a luminal map and validated in the TCGA cohort. **(F)** The box plot analysis of methylation levels for the 10 most hypomethylated genes identified in the field effects in a luminal map and validated in the TCGA cohort. **(G)** The proportion of luminal and basal bladder cancer cases with hypermethylation of the 10 most hypermethylated genes identified in a luminal map and validated in the TCGA cohort. **(H)** The proportion of luminal and basal bladder cancer cases with hypomethylation of the 10 most hypomethylated genes identified in a luminal map and validated in the TCGA cohort. **(I)** The box analysis of methylation levels for the 10 most hypermethylated genes identified in the field effects in a basal map and validated in the TCGA cohort. **(J)** The box analysis of methylation levels for the 10 most hypomethylated genes identified the field effects in the basal map and validated in the TCGA cohort. **(K)** The proportion of luminal and basal bladder cancer cases with hypermethylation of the 10 most hypermethylated genes identified in a luminal map and validated in the TCGA cohort. **(L)** The proportion of luminal and basal bladder cancer cases with hypomethylation of the 10 most hypomethylated genes identified in a basal map and validated in the TCGA cohort. Asterisks indicate statistically significant ( $p$  value  $<0.05$ ) difference based on Wilcoxon rank sum test (Panels E, F, I, and J) and chi-square test (Panels G, H, K, and L); NS, not significant difference ( $p$  value  $\geq 0.05$ ).

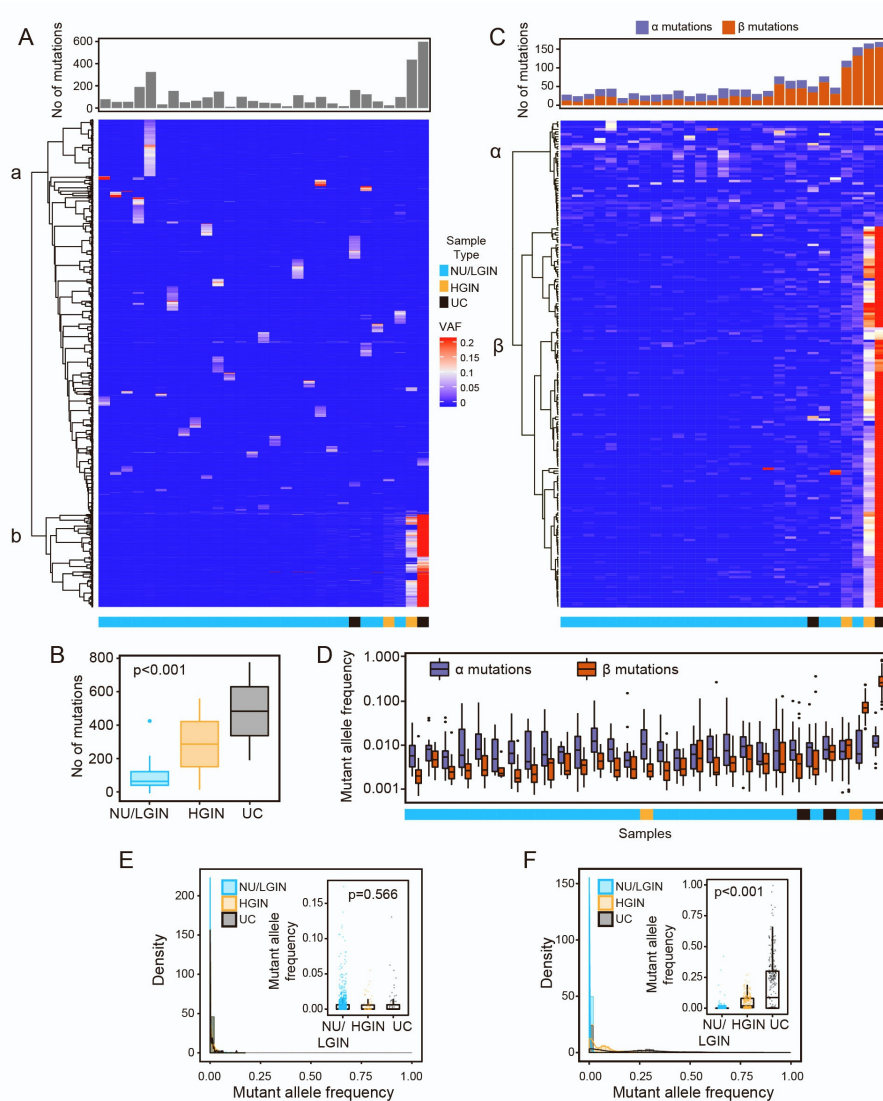

**Figure S12. Enrichment of clonal mutations in the evolution of bladder cancer from field effects along the basal track in map 19, related to Figure 6. (A)** Heat map of nonsilent mutations showing their VAFs in individual mucosal samples. Number of mutations in individual mucosal samples are shown in the top diagram. **(B)** Box plot analysis of mutations in mucosal samples classified as NU/LGIN, HGIN, and UC. **(C)** Heat map of VAFs ( $\geq 0.01$ ) in 198 genes showing variant alleles in at least three mucosal samples. Number of  $\alpha$  and  $\beta$  mutations in individual samples is shown in the top diagram. **(D)** Mutant allele frequencies of  $\alpha$  and  $\beta$  mutations in individual mucosal samples. **(E)** Density plot showing the clonality of nonsilent VAFs in cluster  $\alpha$  with a similar low level of frequency, which decreased in frequency with progression from NU/LGIN to HGIN and UC. Inset, boxplot of VAFs in three groups of mucosal samples of NU/LGIN, HGIN, and UC (Kruskal-Wallis test p value). **(F)** Density plot showing the clonality of nonsilent VAFs in cluster  $\beta$  with a statistically significant increase in clonality with progression from NU/LGIN, HGIN and UC. Inset, boxplot of VAFs in three groups of mucosal samples of NU/LGIN, HGIN, and UC (Kruskal-Wallis test p value). For (B) p values was calculated using ANOVA test.



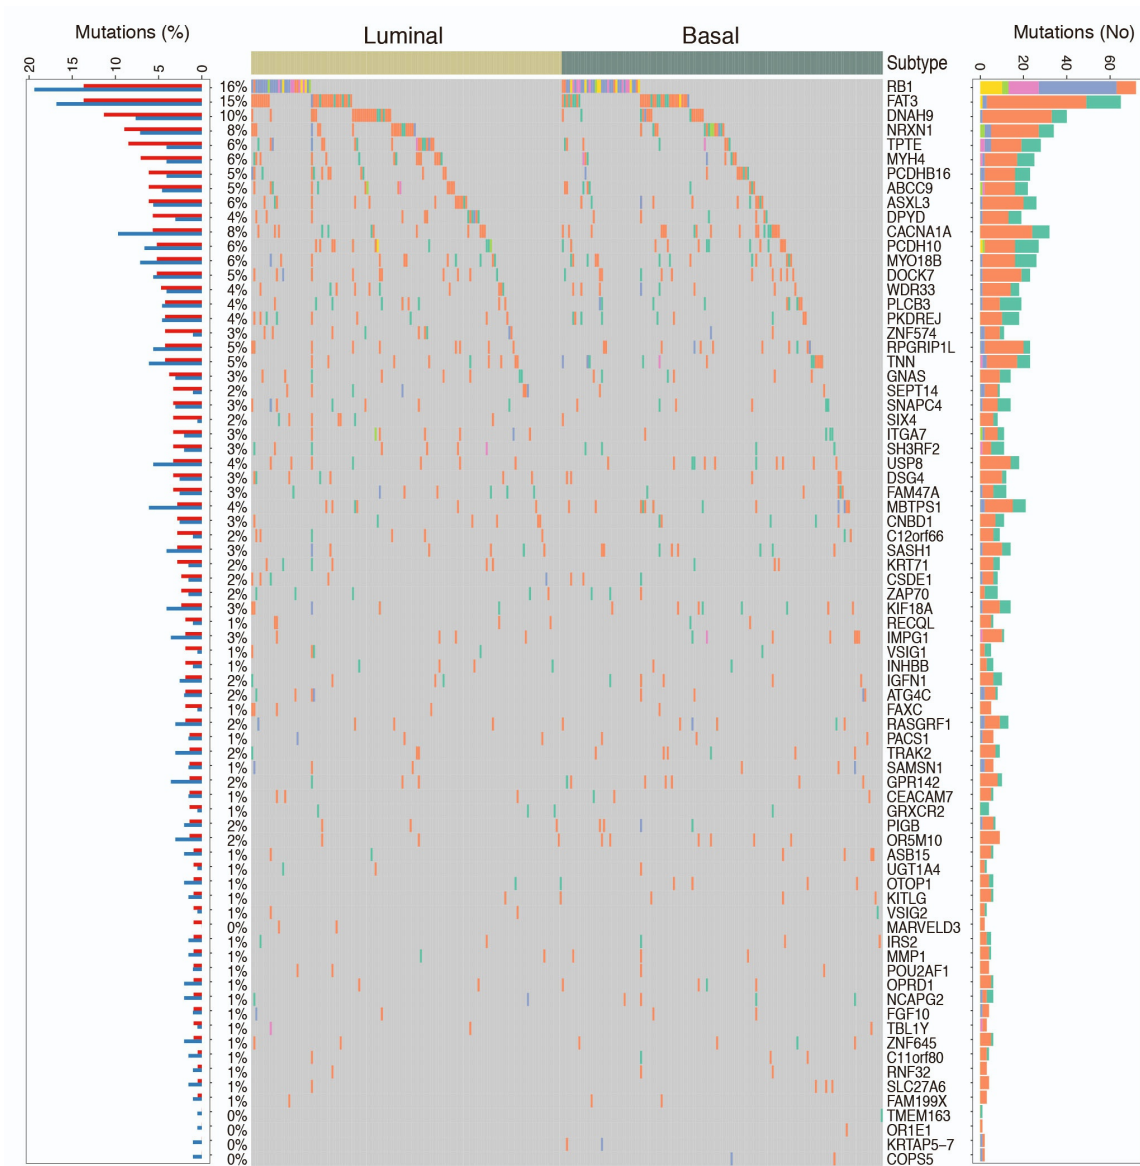

**Classification of mutations**

- Silent\_Mutation
- Nonsense\_Mutation
- Frame\_Shift\_Del
- Missense\_Mutation
- Splice\_Site
- Frame\_Shift\_Ins

**Figure S13. Mutational landscape of 80 mutations with VAFs ( $\geq 0.01$ ) showing mutations in at least three samples in a whole-organ luminal map analyzed in the TCGA cohort, related to Figure 6.** Mutations of these 80 genes in cluster  $\alpha$  were identified in a whole-organ luminal map and shown in cluster  $\alpha$  in Figure 6B and were analyzed in the TCGA cohort. The bars on the right show the numbers of specific substitutions for individual genes. The bars on the left show the frequencies of mutations in luminal and basal bladder cancers.

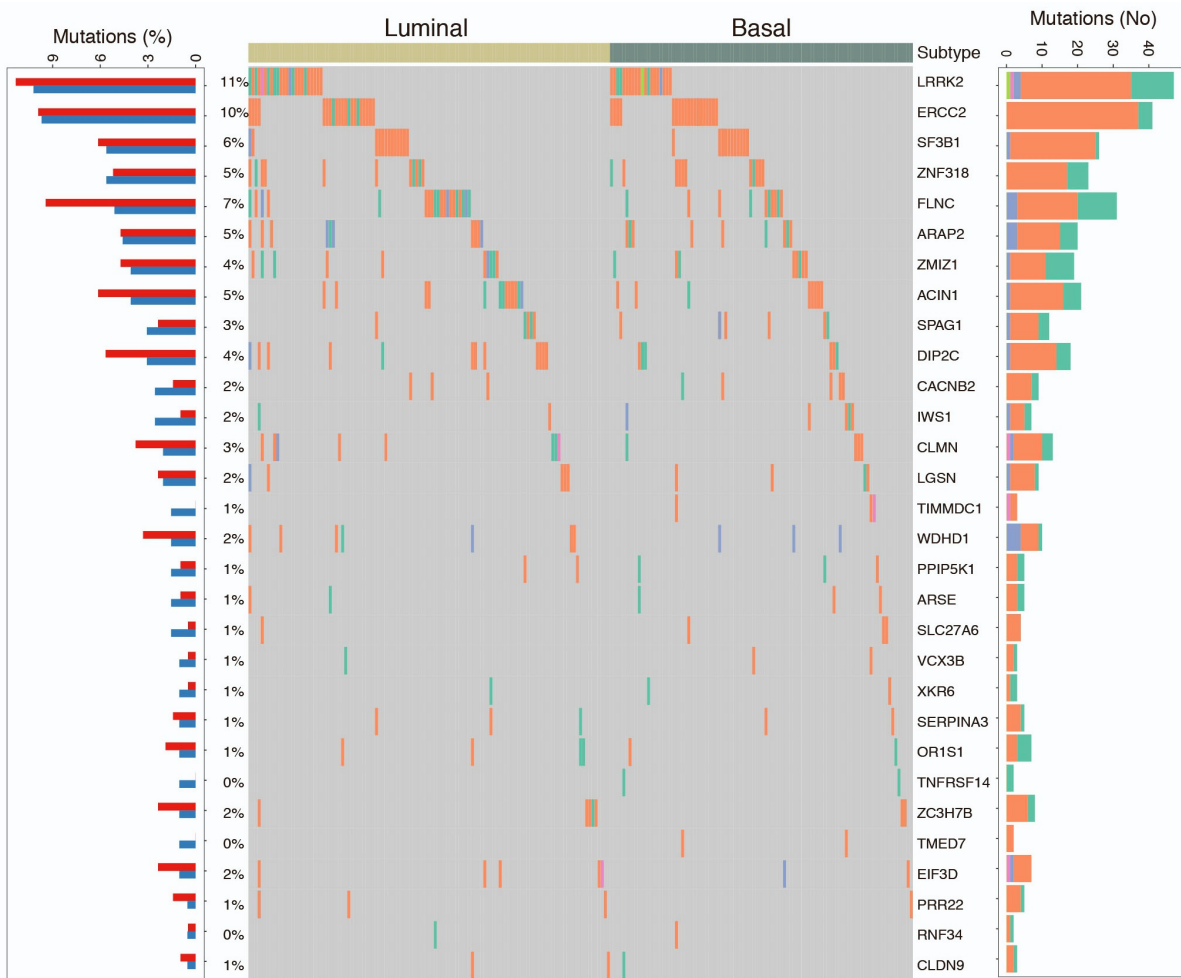

**Classification of mutations**

- Silent\_Mutation
- Nonsense\_Mutation
- Frame\_Shift\_Del
- Missense\_Mutation
- Splice\_Site
- Frame\_Shift\_Ins

**Figure S14. Mutational landscape of 43 mutations with VAFs ( $\geq 0.01$ ) showing mutations in at least three samples in a whole-organ basal map analyzed in the TCGA cohort, related to Figure 6. Mutations of these 43 genes in cluster  $\alpha$  were identified in a whole-organ basal map and shown in cluster  $\alpha$  in Figure S12B and were analyzed in the TCGA cohort. The bars on the right show the numbers of specific substitutions for individual genes. The bars on the left show the frequencies of mutations in luminal and basal bladder cancers.**

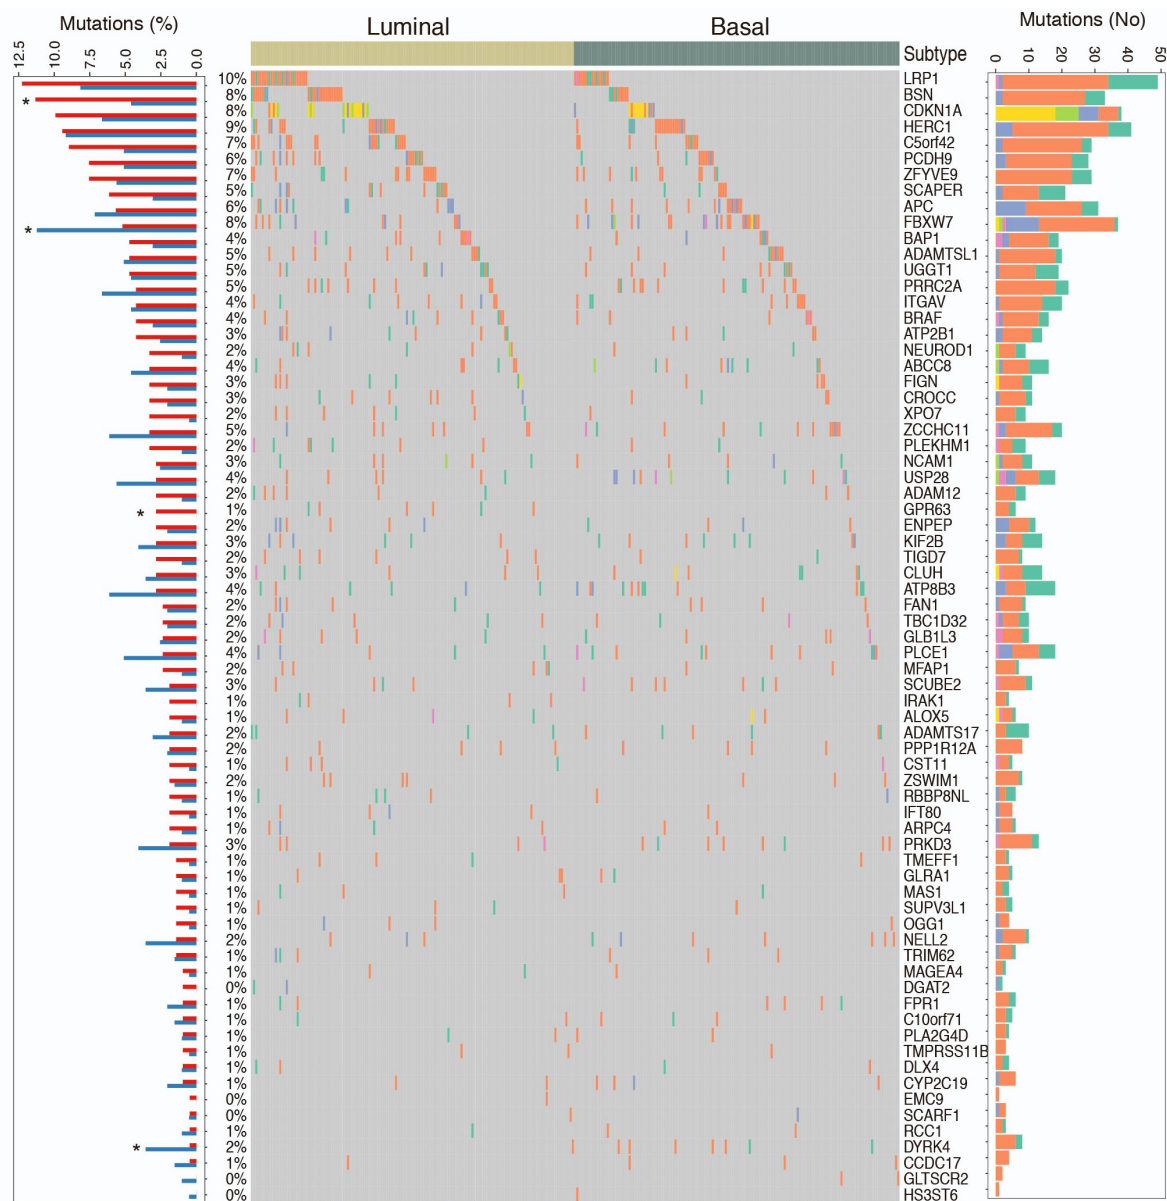

### Classification of mutations

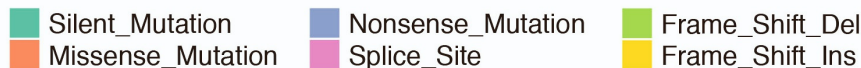

**Figure S15. Mutational landscape of 77 mutations with VAFs ( $\geq 0.01$ ) showing mutations in at least three samples in a whole-organ luminal map analyzed in the TCGA cohort, related to Figure 6. Mutations of these 77 genes in cluster  $\beta$  were identified in a whole-organ luminal map and shown in cluster  $\beta$  in Figure 6B and were analyzed in the TCGA cohort. The bars on the right show the numbers of specific substitutions for individual genes. The bars on the left show the frequencies of mutations in luminal and basal bladder cancers. Asterisks denote genes with significant p-values ( $< 0.05$ ) based on Fisher's exact test.**



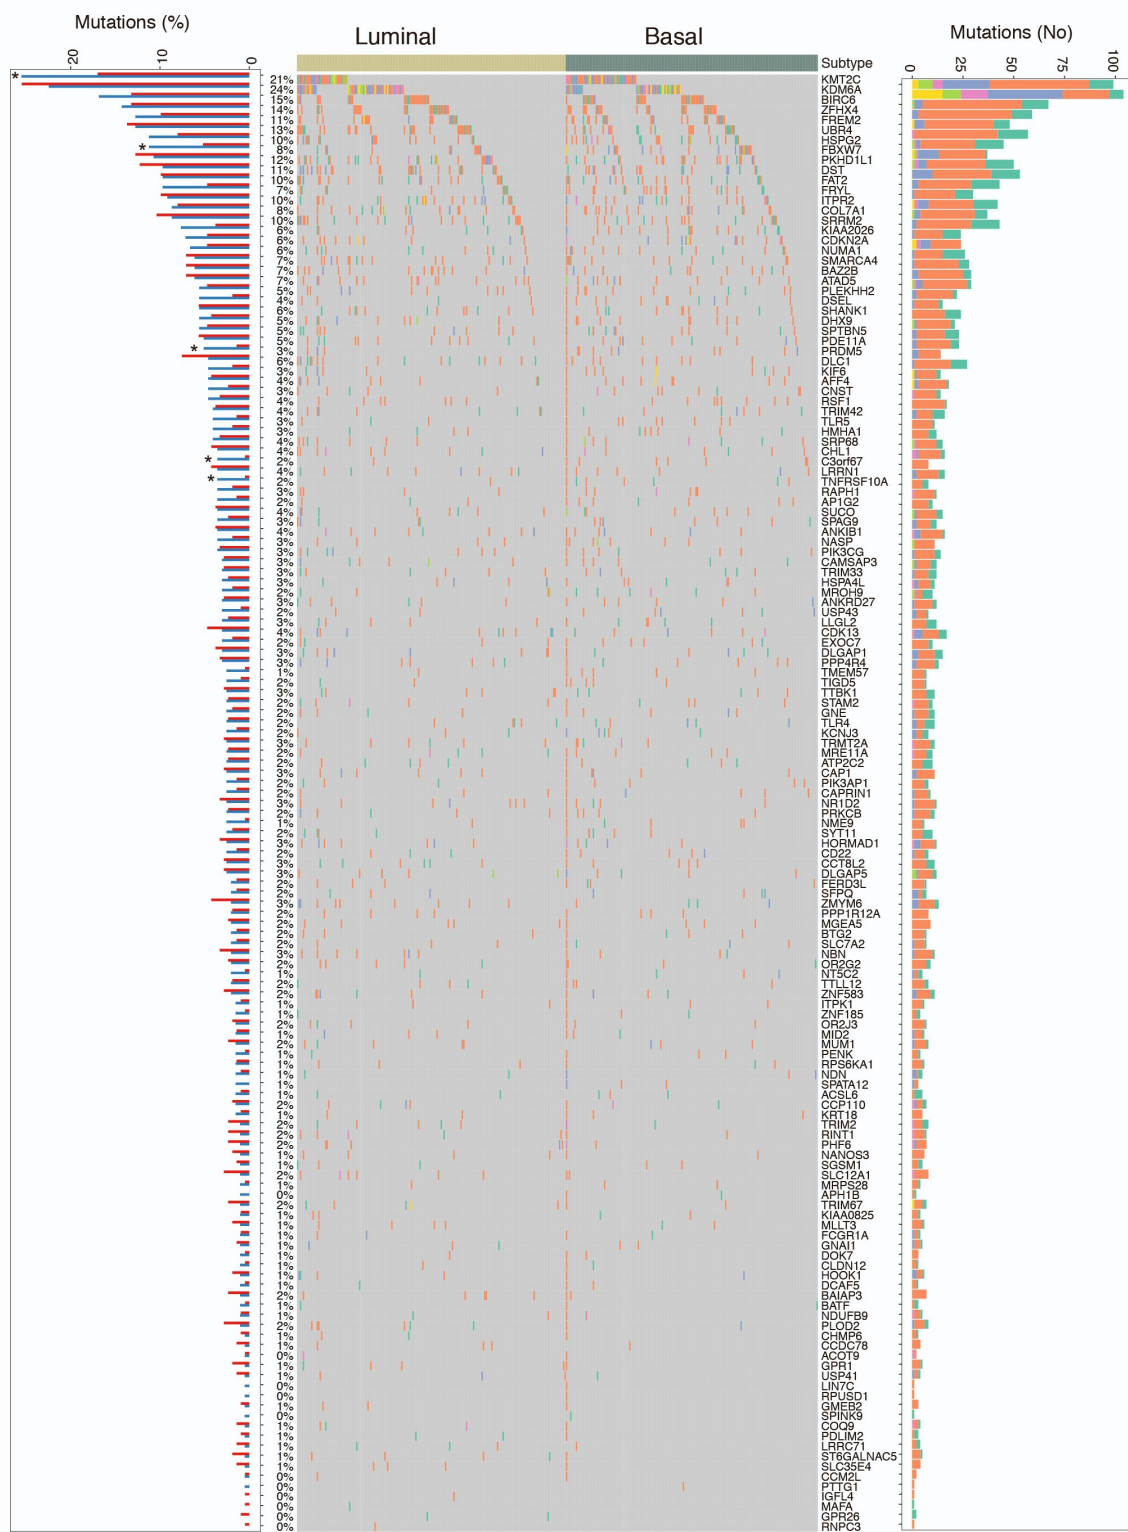

**Classification of mutations**

- Silent\_Mutation
- Nonsense\_Mutation
- Frame\_Shift\_Del
- Missense\_Mutation
- Splice\_Site
- Frame\_Shift\_Ins

**Figure S16. Mutational landscape of 155 mutations with VAFs ( $\geq 0.01$ ) showing mutations in at least three samples in a whole-organ basal map analyzed in the TCGA cohort, related to Figure 6.** Mutations of these 155 genes in cluster  $\beta$  were identified in a whole-organ basal map and shown in cluster  $\beta$  in **Figure S12B** and were analyzed in the TCGA cohort. The bars on the right show the number of specific substitutions for individual genes. The bars on the left show the frequency of mutations in luminal and basal bladder cancers. Asterisks denote genes with significant p-values ( $< 0.05$ ) based on Fisher's exact test.

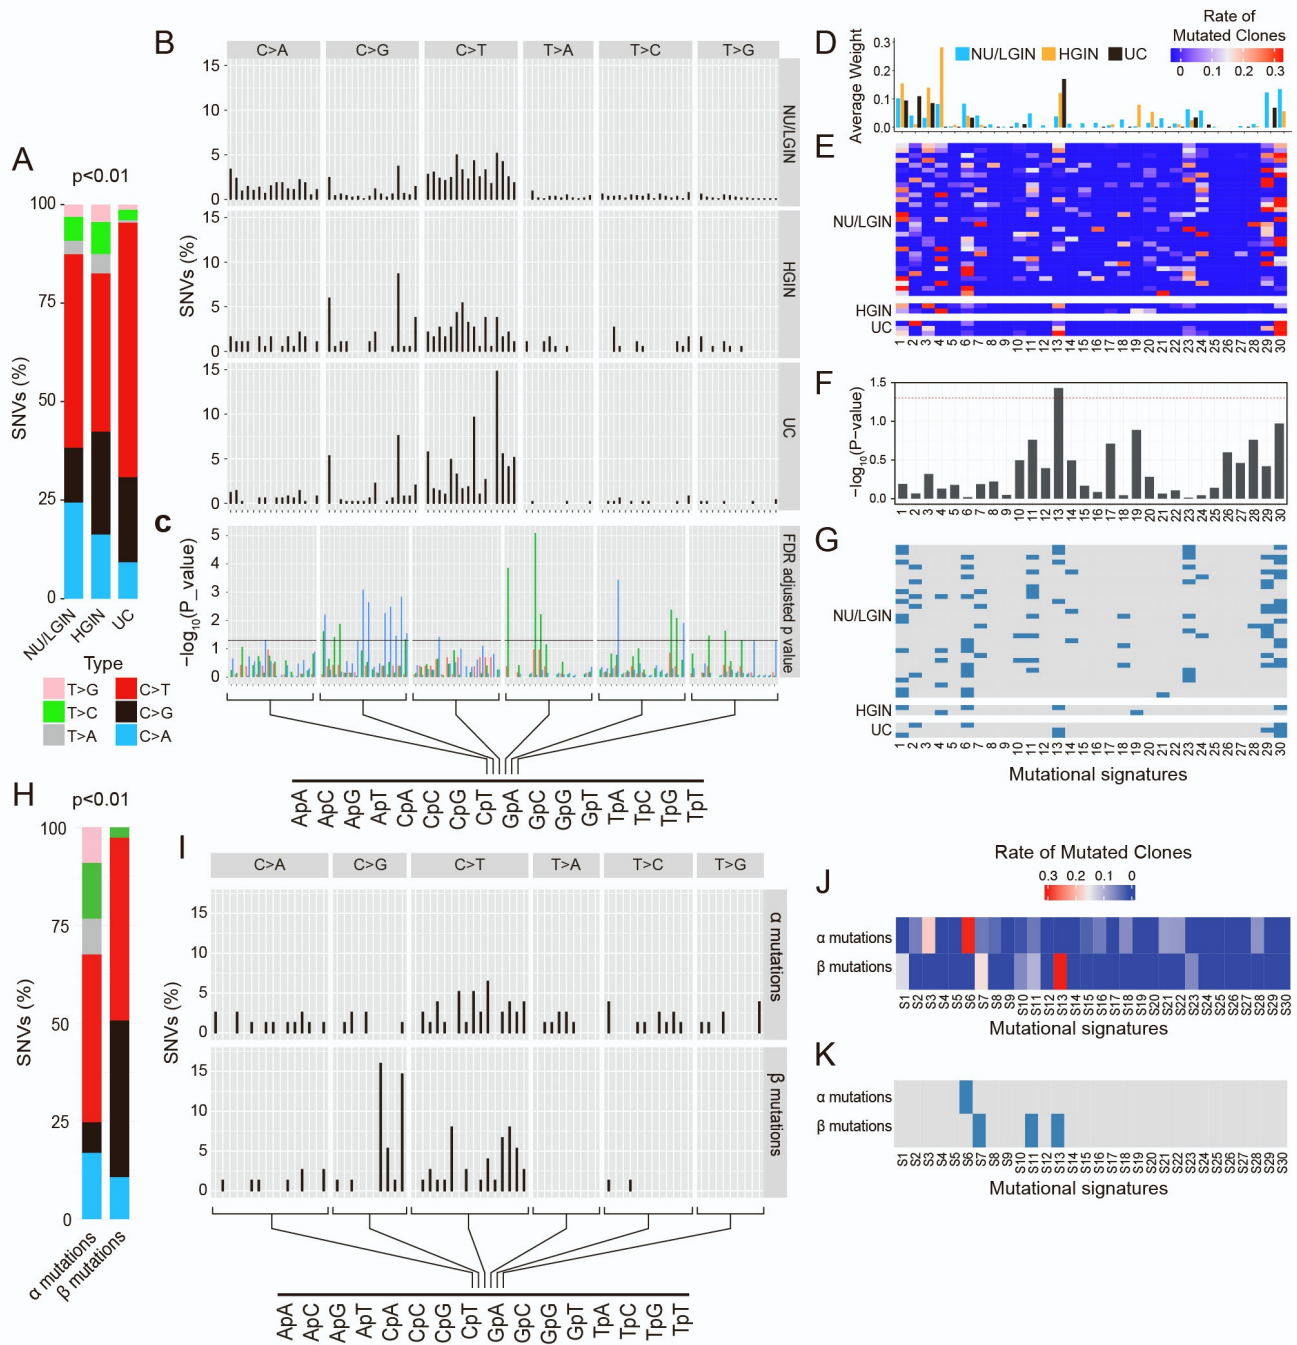

**Figure S17. Mutagenesis patterns as they evolve from field effects in bladder cancer developing along the luminal track in map 24, related to Figure 6. (A)** Composite bar graphs showing the distribution of all nucleotide substitutions in relation to cancer evolution from NU/LGIN through HGIN to UC. It shows a significant increase in the number of C>T mutations (Fisher's exact test;  $p < 0.001$ ) that parallels the evolution to HGIN and UC. **(B)** Proportion of SNVs in specific nucleotide motifs for each category of substitution in three sets of samples corresponding to NU/LGIN, HGIN, and UC. **(C)** FDRs for specific nucleotide motifs in the progression of neoplasia from NU/LGIN through HGIN to UC. **(D)** Weight scores for mutagenesis patterns in three groups of samples corresponding to NU/LGIN, HGIN, and UC. **(E)** Weight scores for mutagenesis patterns in individual samples of bladder mucosa. **(F)** Significance of mutational patterns in the progression of neoplasia from NU/LGIN through HGIN to UC. **(G)** Significance of contributions for mutagenesis signatures in individual samples after bootstrapping analysis. The blue boxes indicate  $p$  values  $< 0.05$ . **(H)** Composite bar graphs showing the distribution of nucleotide substitutions in  $\alpha$  and  $\beta$  mutations. **(I)** Proportion of SNVs in specific nucleotide motifs for each category of substitution for  $\alpha$  and  $\beta$  mutations. **(J)** Weight scores for mutagenesis patterns of  $\alpha$  and  $\beta$  mutations. **(K)** Significance of contributions for mutagenesis signatures associated with  $\alpha$  and  $\beta$  mutations after bootstrapping analyses. The blue boxes indicate  $p$  values  $< 0.05$ . For (A) and (H)  $p$  values were calculated using a test of proportions. For (C) and (F)  $p$  values were calculated using Wilcoxon test and a Kruskal-Wallis test, respectively.



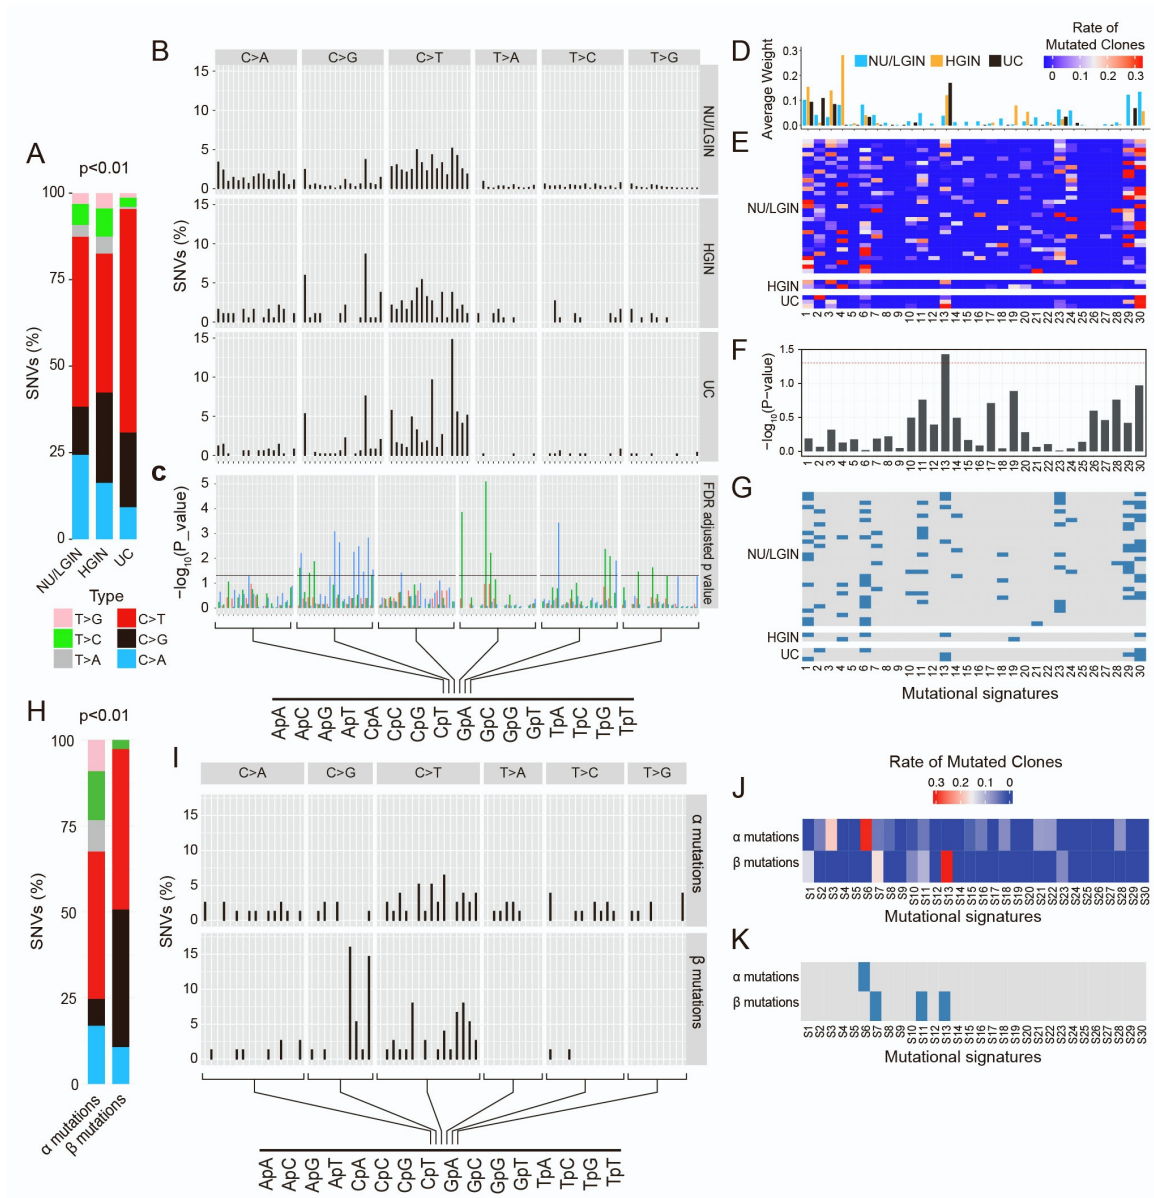

**Figure S18. Mutagenesis patterns as they evolve from field effects in bladder cancer developing along the basal track in map 19, related to Figure 6. (A)** Composite bar graphs showing the distribution of all nucleotide substitutions in relation to cancer evolution from NU/LGIN through HGIN to UC. It shows a significant increase in the number of C>T mutations (Fisher's exact test;  $p < 0.001$ ) that parallels the evolution to HGIN and UC. **(B)** Proportion of SNVs in specific nucleotide motifs for each category of substitution in three sets of samples of NU/LGIN, HGIN, and UC. **(C)** FDRs for specific nucleotide motifs in the progression of neoplasia from NU/LGIN through HGIN to UC. **(D)** Weight scores for mutagenesis patterns in three groups of samples corresponding to NU/LGIN, HGIN, and UC. **(E)** Weight scores for mutagenesis patterns in individual samples of bladder mucosa. **(F)** Significance of mutational patterns in the progression of neoplasia from NU/LGIN through HGIN to UC. **(G)** Significance of contributions of mutagenesis signatures in individual samples after bootstrapping analysis. The blue boxes indicate  $p$  values  $< 0.05$ . **(H)** Composite bar graphs showing the distribution of nucleotide substitutions in  $\alpha$  and  $\beta$  mutations. **(I)** Proportion of SNVs in specific nucleotide motifs for each category of substitution for  $\alpha$  and  $\beta$  mutations. **(J)** Weight scores for mutagenesis patterns of  $\alpha$  and  $\beta$  mutations. **(K)** Significance of contributions for mutagenesis signatures associated with  $\alpha$  and  $\beta$  mutations after bootstrapping analyses. The blue boxes indicate  $p$  values  $< 0.05$ . For (A) and (H)  $p$  values were calculated using a test of proportions. For (C) and (F)  $p$  values were calculated using Wilcoxon test and a Kruskal-Wallis test, respectively.

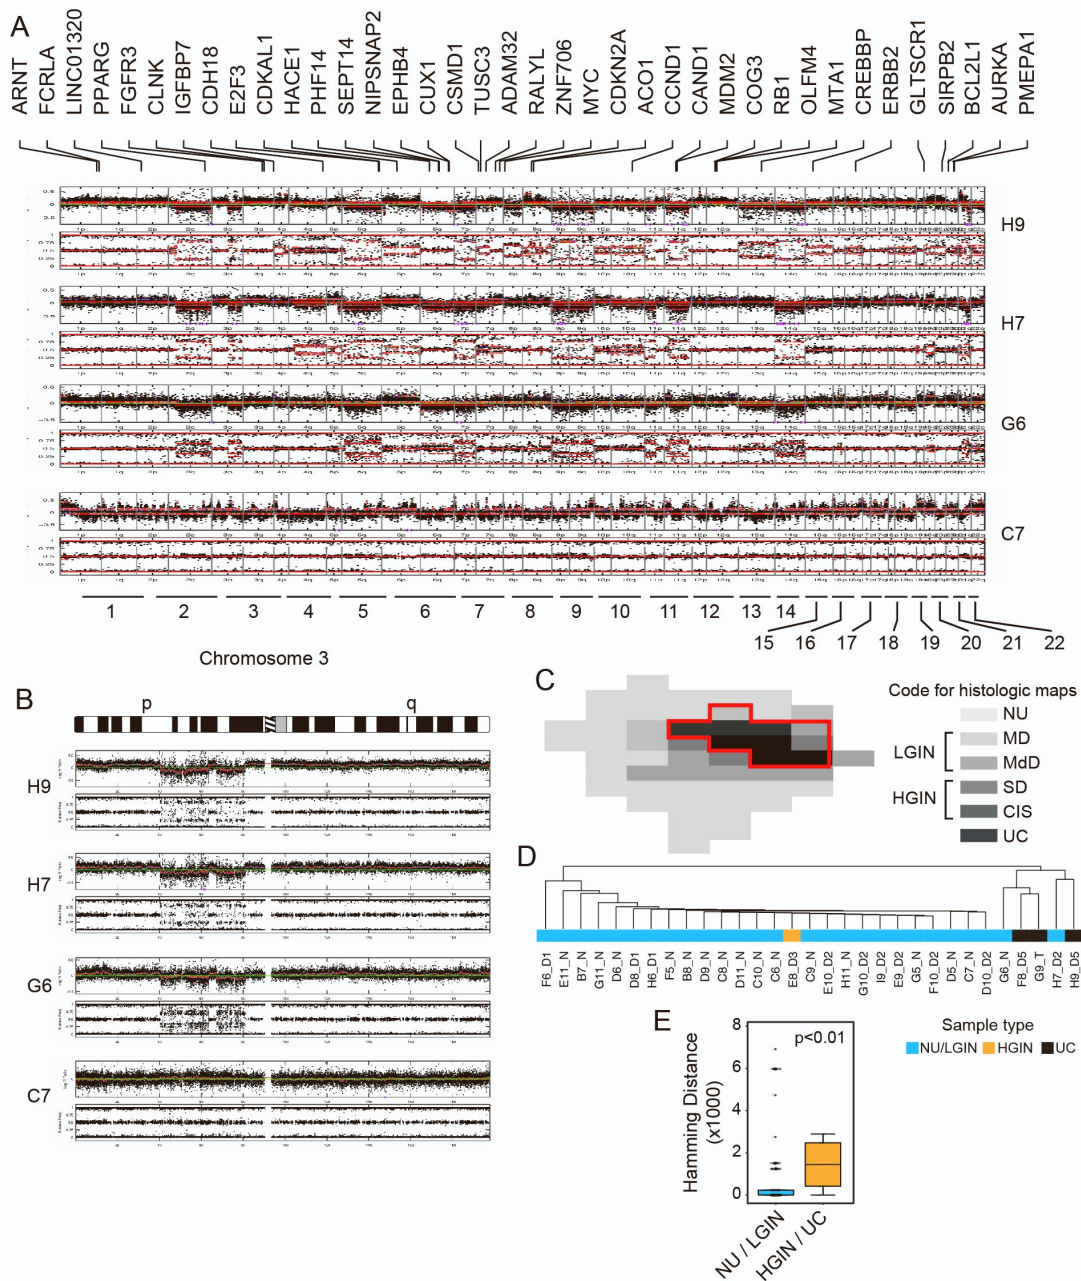

**Figure S19. Evolution of copy-number changes from field effects to UC in a luminal map, related to Figure 7. (A)** Log R ratios (top) and B-allele frequencies (bottom) for all chromosomes in representative samples of bladder mucosa reflecting the pattern of progression from NU/LGIN through HGIN to UC. **(B)** Expanded view of chromosome 3 showing log R ratios (top) and B-allele frequencies (bottom) demonstrating segmental loss of chromosome 3p in representative samples of bladder mucosa reflecting the pattern of progression from NU/LGIN through HGIN to UC. **(C)** Histologic map of a luminal cystectomy sample. The red line outlines a plaque of bladder mucosa with widespread genomic changes in CNVs. **(D)** Hierarchical clustering analysis of mucosal samples according to the copy number alterations. **(E)** CNV difference calculated as the Hamming distance in the two groups of samples corresponding to NU/LGIN and HGIN/UC (Wilcoxon rank-sum test p value).

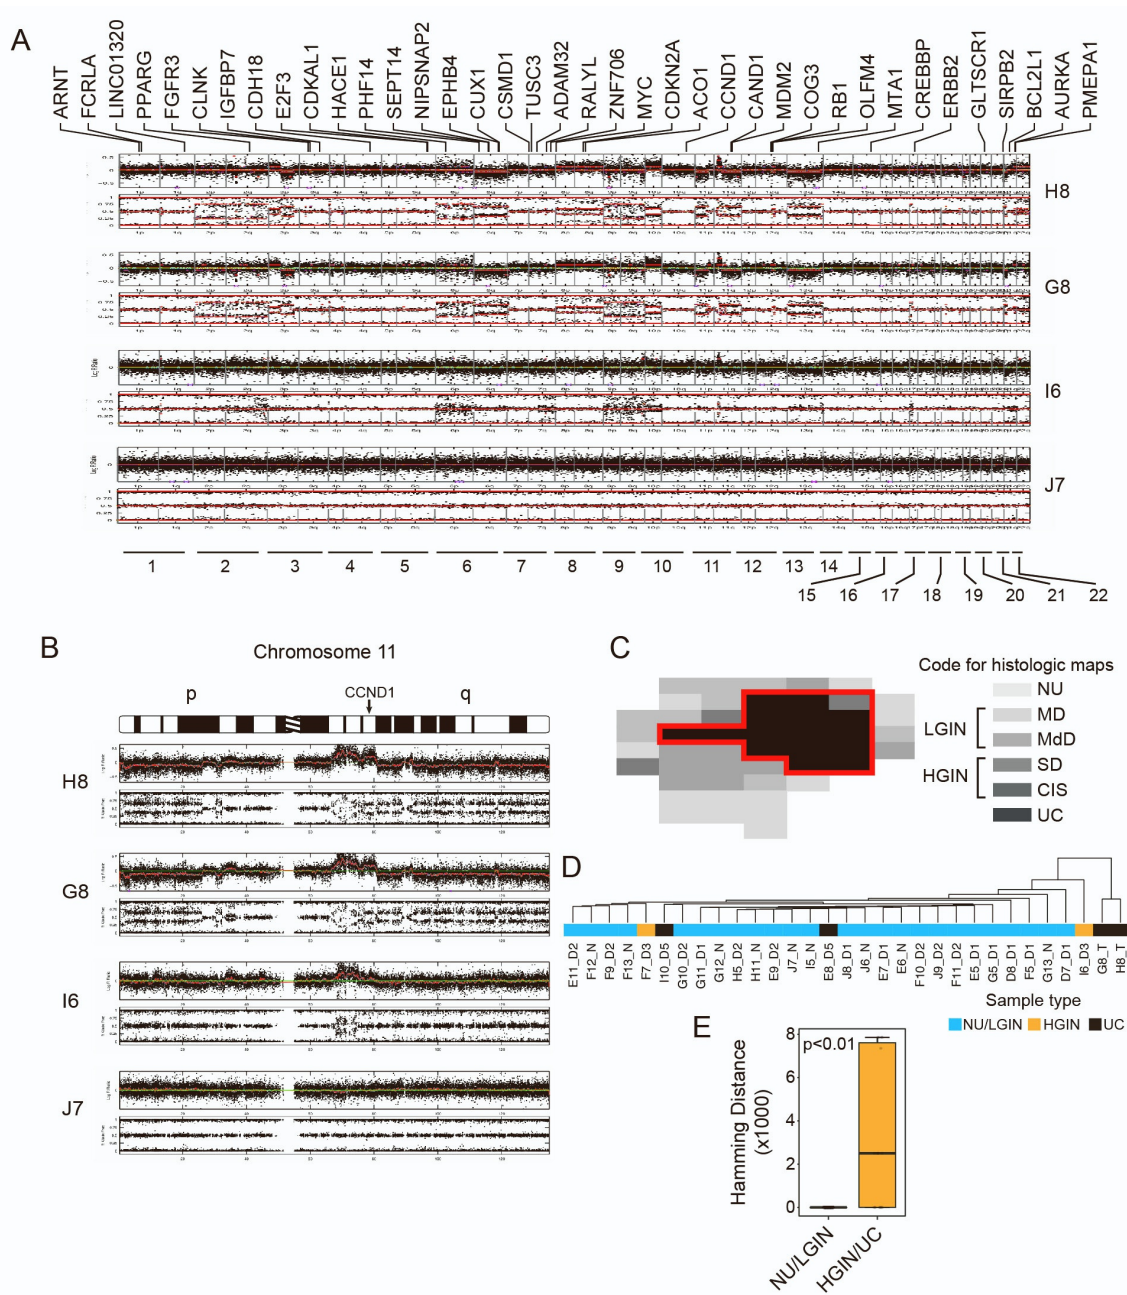

**Figure S20. Evolution of copy-number changes from field effects to UC in a basal map, related to Figure 7. (A)** Log R ratios (top) and B-allele frequencies (bottom) for all chromosomes in representative samples of bladder mucosa reflecting the pattern of progression from NU/LGIN through HGIN to UC. **(B)** Expanded view of chromosome 11 showing log R ratios (top) and B-allele frequencies (bottom) with segmental amplification chromosome 11q containing *CCND1* in representative samples of bladder mucosa reflecting the pattern of progression from NU/LGIN through HGIN to UC. **(C)** Histologic map of a cystectomy sample. The red line outlines a plaque of bladder mucosa with widespread genomic changes in CNVs. **(D)** Hierarchical clustering analysis of mucosal samples according to the copy number alterations. **(E)** CNV difference calculated as the Hamming distance in the two groups of samples corresponding to NU/LGIN and HGIN/UC (Wilcoxon rank-sum test  $p$  value).



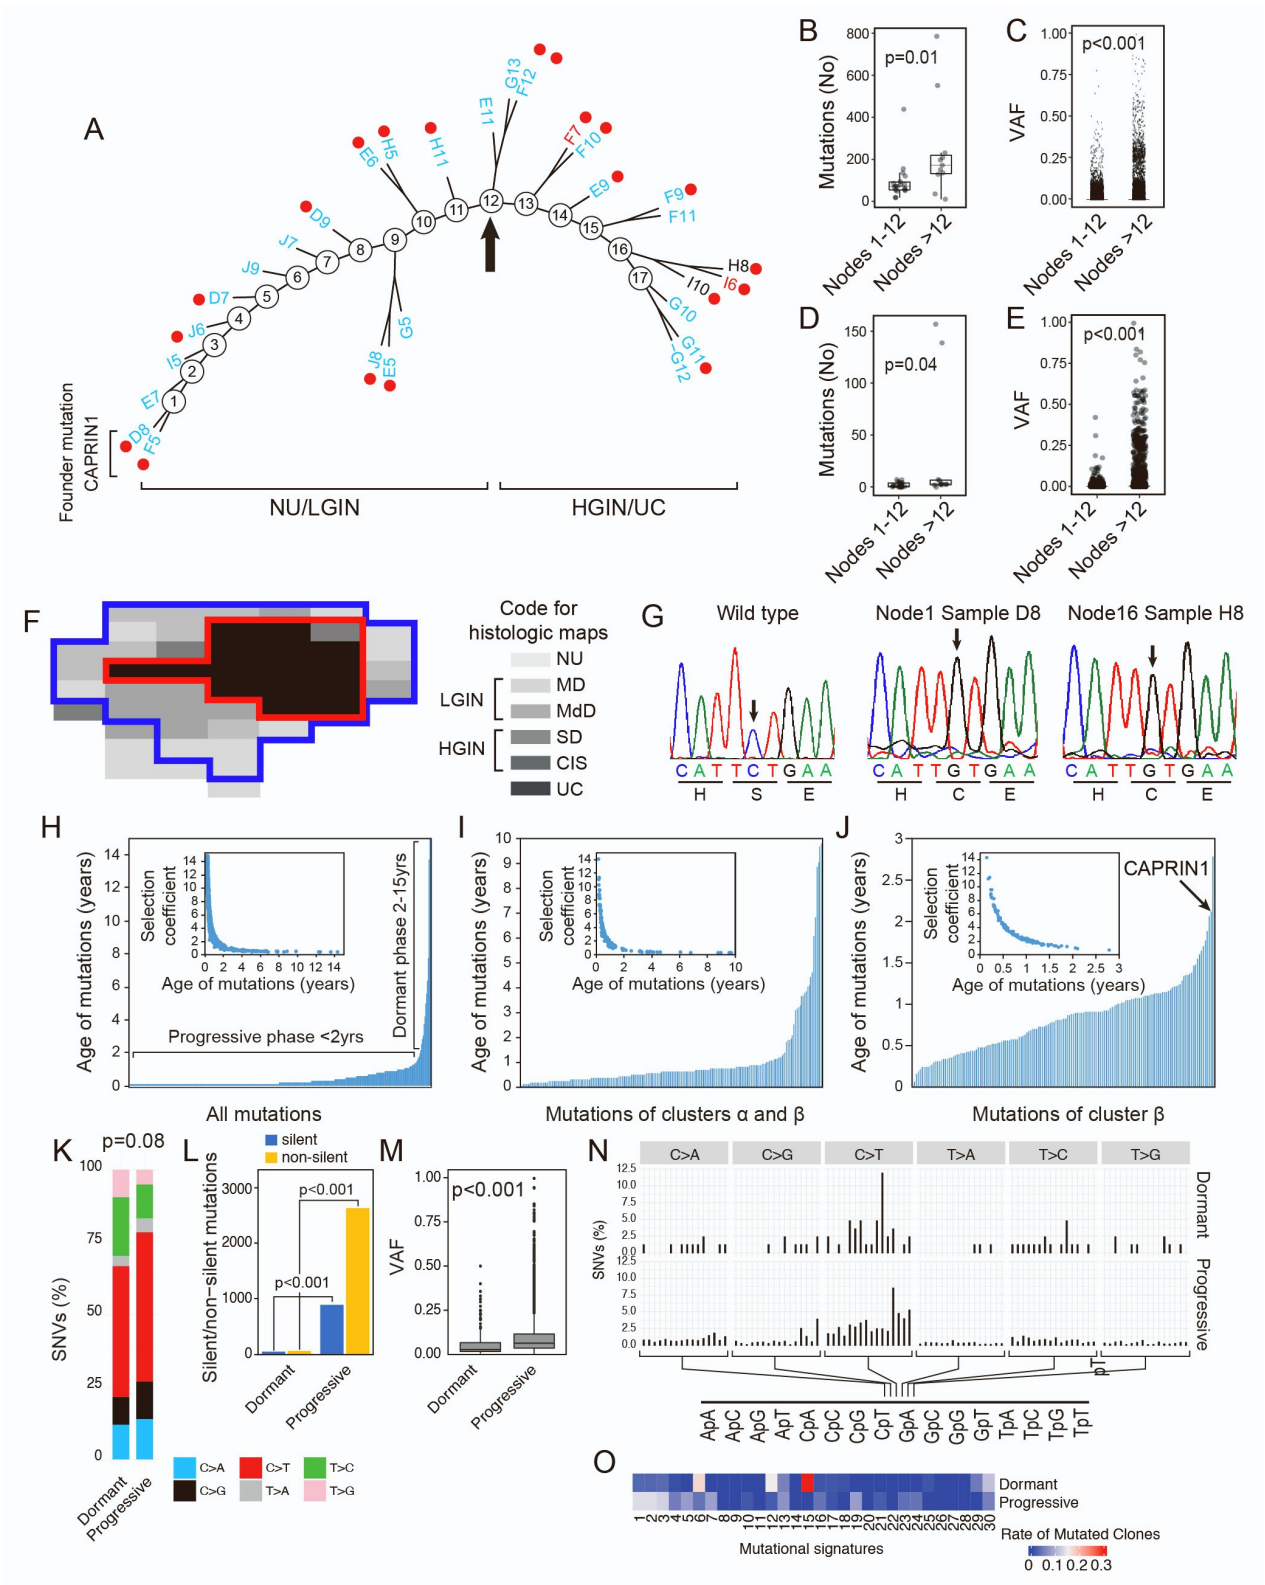

**Figure S21. Reconstruction of the evolutionary tree in bladder cancer developing along the basal track in map 19, related to Figure 7. (A)** Parsimony analysis showing an evolutionary tree with 17 nodes of expansion of successive clones in the field effects corresponding to NU/LGIN. Node 13 signifies the progression to HGIN, and all samples of HGIN and UC evolved through four additional waves of clonal evolution (nodes 14-17). **(B)** Numbers of all nonsynonymous mutations in mucosal samples of nodes 1-12 and nodes >12. **(C)** VAFs of all nonsynonymous mutations in samples connected to nodes 1-12 and nodes >12 (Wilcoxon rank-sum p value). **(D)** Numbers of mutations in cluster  $\beta$  in nodes 1-12 and nodes >12. **(E)** VAFs of mutations in cluster  $\beta$  in nodes 1-12 and >12 (Wilcoxon rank-sum p value). **(F)** Histologic map of a cystectomy specimen. The blue line outlines a plaque of bladder mucosa with a mutation of a founder gene (*CAPRIN1*). The red line outlines a plaque of bladder mucosa with widespread genomic changes in CNVs. **(G)** Validation of *CAPRIN1* mutational inactivation by Sanger sequencing. Variant allele of *CAPRIN1* DNA tracings are shown in selected mucosal samples and compared to the wild-type sequence **(H)** Mathematical modeling of bladder cancer evolution from field effects using all nonsynonymous mutations. Inset, the selection coefficient related to the ages of the mutations. **(I)** Mathematical modeling of bladder cancer evolution from field effects using clonally expanding mutations in clusters  $\alpha$  and  $\beta$ . Inset, the selection coefficient related to the ages of the mutations. **(J)** Mathematical modeling of bladder cancer evolution from field effects using clonally expanding mutations in cluster  $\beta$ . Inset, the selection coefficient related to the ages of the mutations. Wilcoxon rank-sum test p values in panels B, C, D, and E. **(K)** Composite bar graph showing the distribution of all nucleotide substitutions in dormant and progressive phases of bladder cancer development. **(L)** Bar plots showing the number of silent and non-silent mutations in the dormant and progressive phases of bladder cancer development. **(M)** VAF in dormant and progressive phases of bladder cancer development. **(N)** Proportion of SNVs in specific nucleotide motifs for each category of substitutions in dormant and progressive phases of bladder cancer development. **(O)** Weight scores for mutagenesis patterns in dormant and progressive phases of bladder cancer development. For (B) and (D) p values were calculated using a Kruskal-Wallis test. For (K) and (L) p values were calculated using a test of proportions. For (M) p values were calculated using a two sample Wilcoxon test.

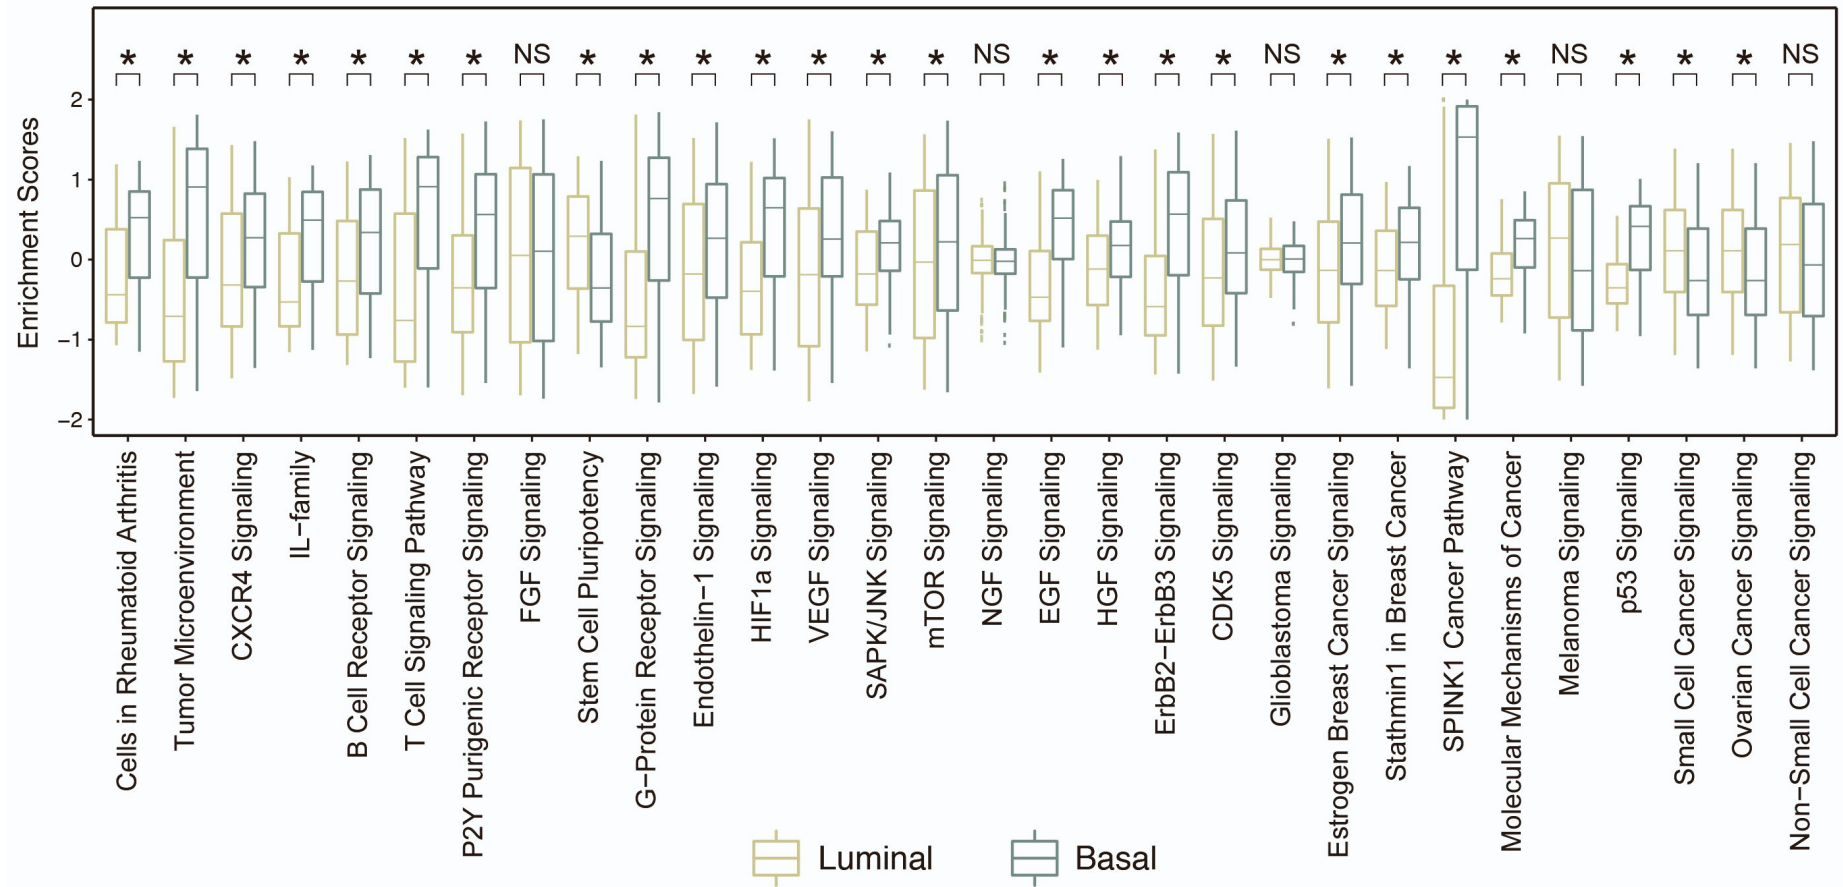

**Figure S22.** The box plot analysis of the enrichment scores of the regulons controlling immunity, inflammation, signal transduction/differentiation, and oncogenesis in molecular subtypes in the TCGA cohort, related to Figure 8. Asterisks indicate statistically significant difference (p value <0.05) based on Wilcoxon rank-sum test; NS, not significant difference (p value ≥0.05).

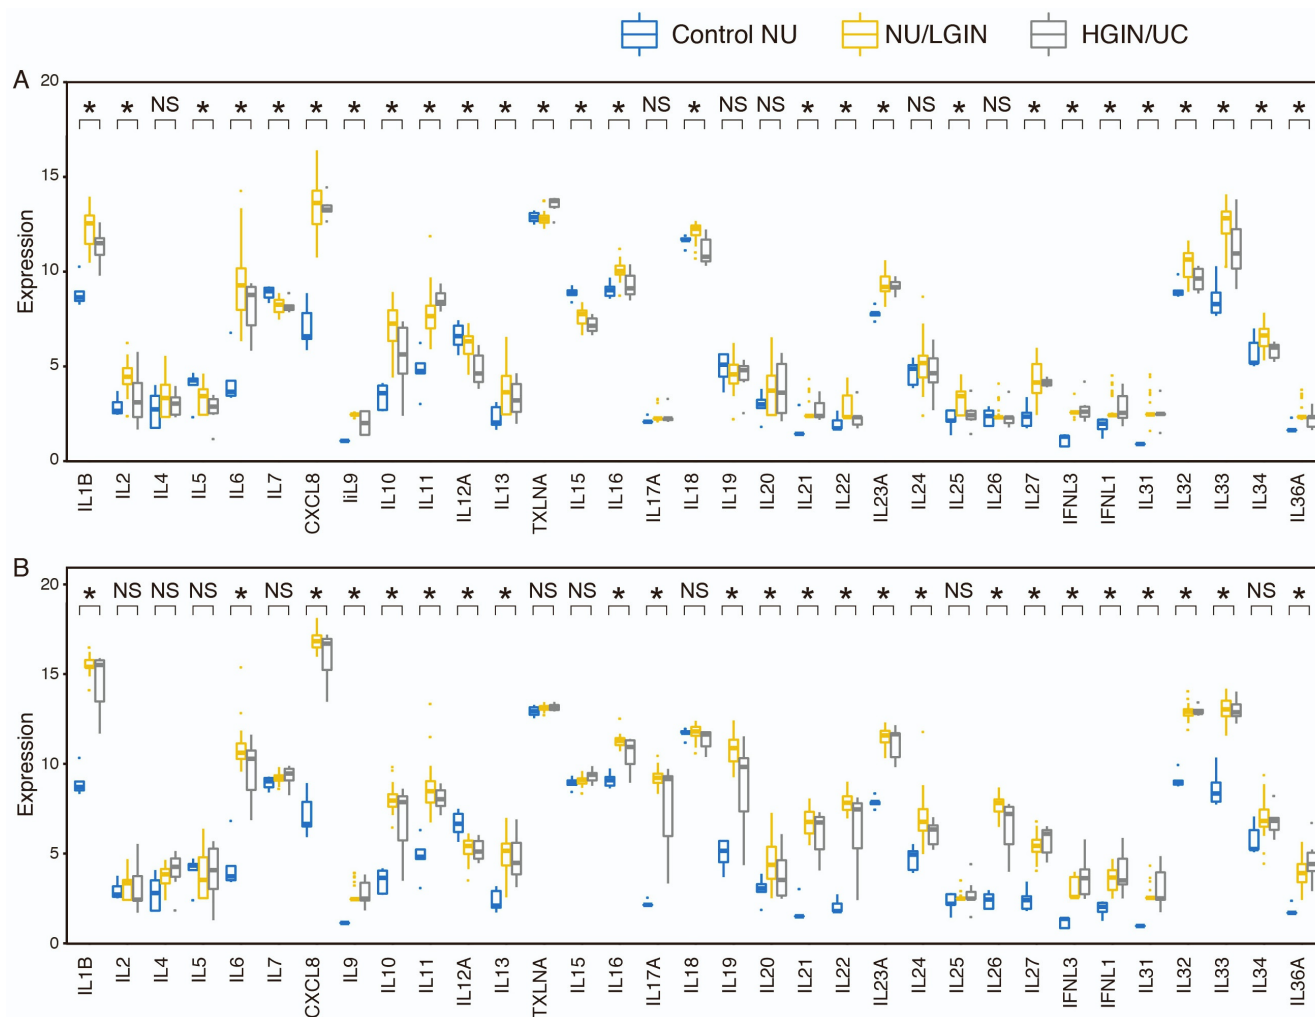

**Figure S23. The box plot analysis of the expression levels of interleukins in the two groups of mucosal samples of NU/LGIN and HGIN/UC compared to control NU, related to Figure 8. (A) Expression levels of interleukins in a luminal map. (B) Expression levels of interleukins in a basal map. Asterisks indicate statistically significant difference (p value <0.05) based on ANOVA F-test; NS, not significant difference (p value ≥0.05).**



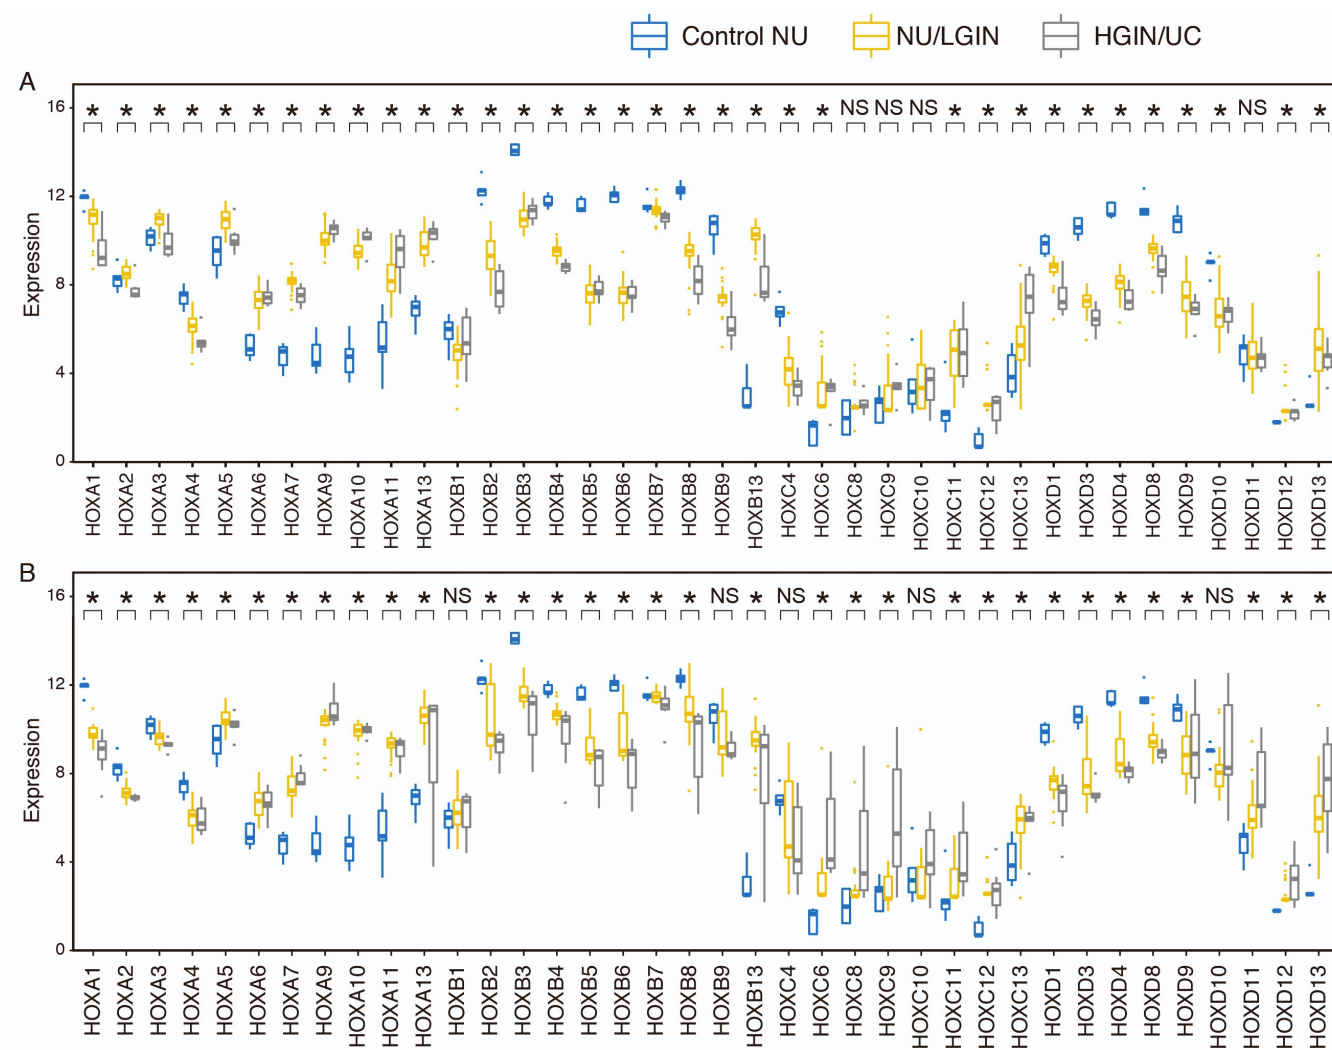

**Figure S24.** The box plot analysis of the expression levels of the HOX genes in the two groups of mucosal samples of NU/LGIN and HGIN/UC compared to control NU, related to Figure 8. (A) Expression levels of the HOX genes in a luminal map. (B) Expression levels of the HOX genes in a basal map. Asterisks indicate statistically significant difference (p value <0.05) based on ANOVA F-test; NS, not significant difference (p value ≥0.05).

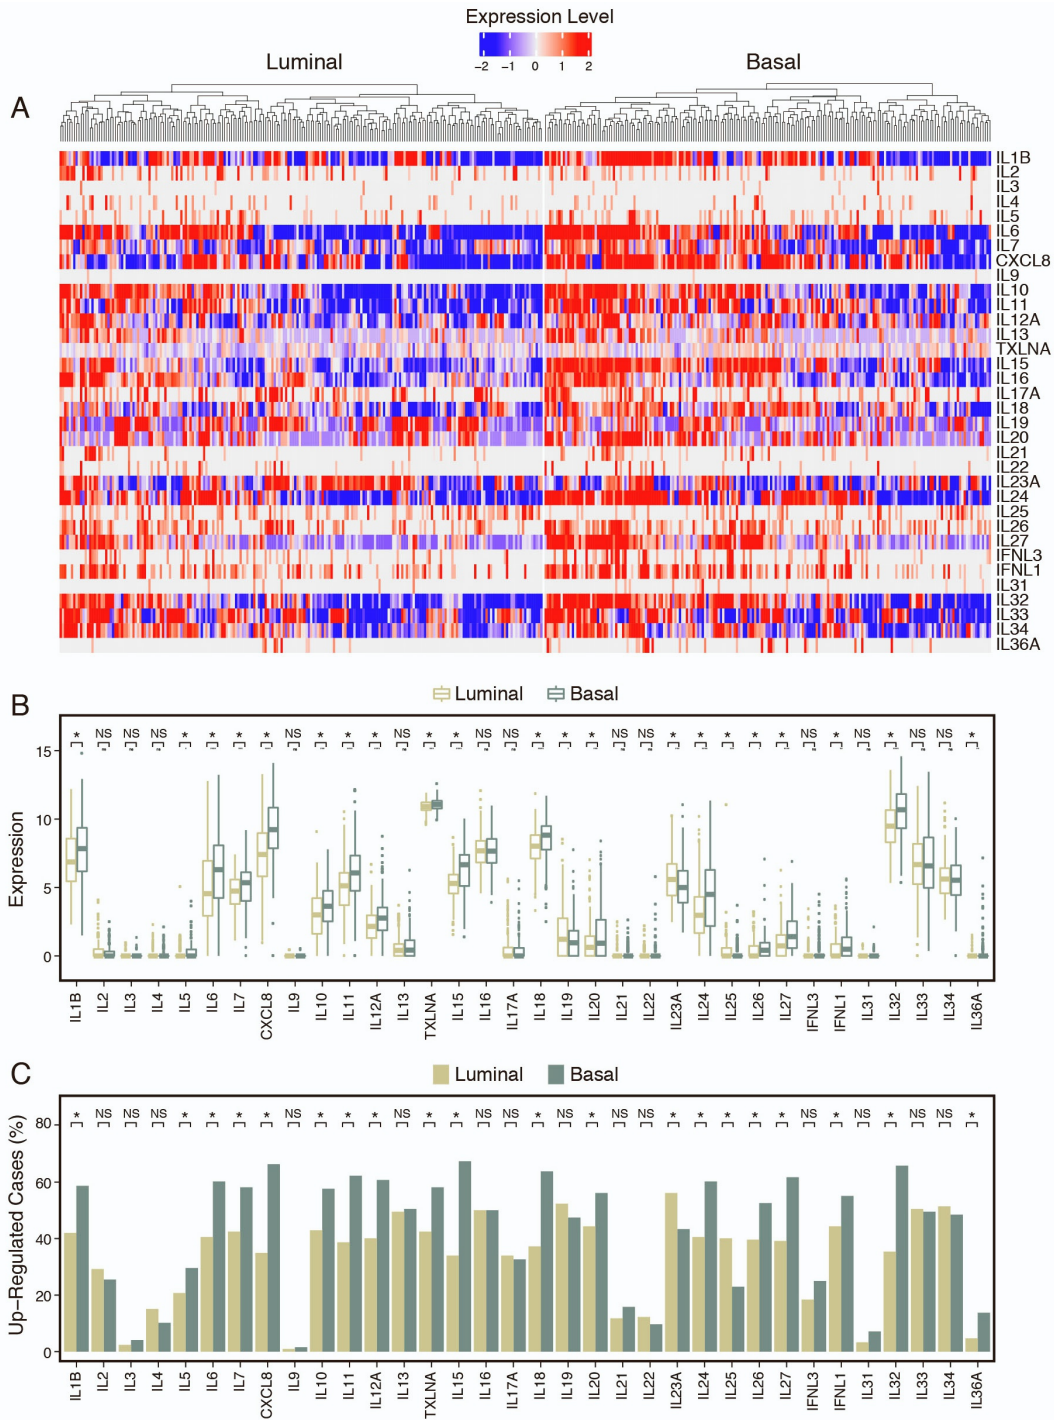

**Figure S25. Expression patterns for all interleukins validated in the TCGA cohort, related to Figure 8.** (A) Expression pattern of the interleukins in the luminal and basal bladder cancers. (B) The box plot analysis of interleukins expression levels in the luminal and basal bladder cancers. (C) The proportion of luminal and basal bladder cancer cases with upregulated interleukins. Asterisks indicate statistically significant difference ( $p$  value  $< 0.05$ ) based on Wilcoxon rank-sum test (B) and chi-squared test (C); NS, not significant difference ( $p$  value  $\geq 0.05$ ).

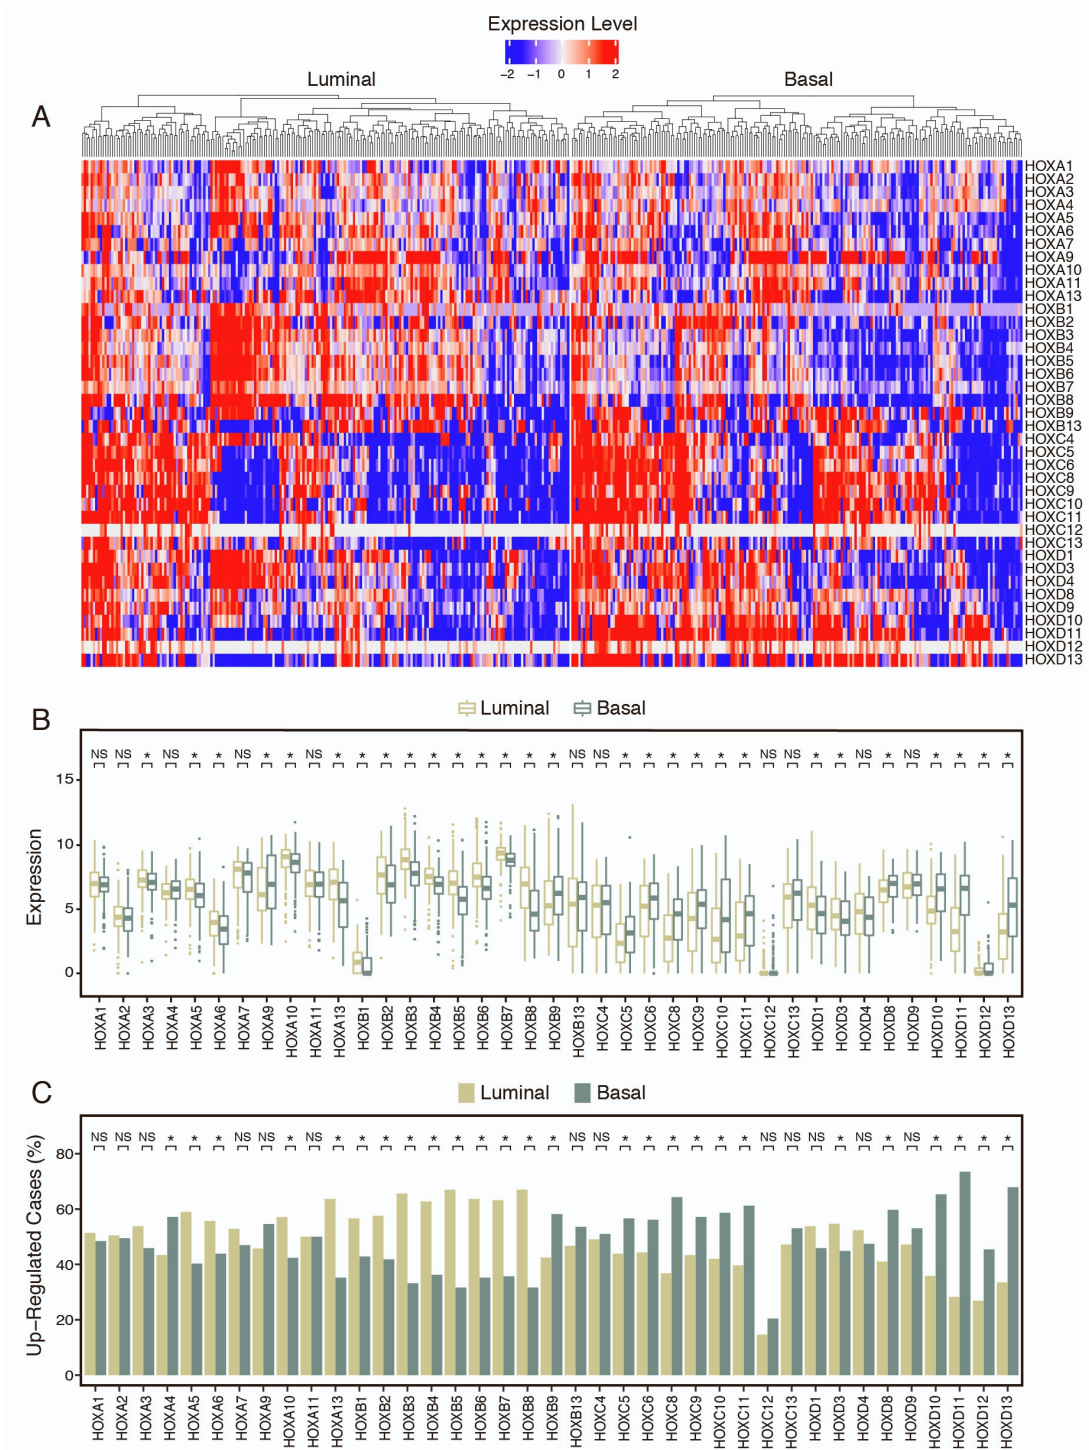

**Figure S26. Expression patterns for all HOX genes validated in the TCGA cohort, related to Figure 8. (A)** Expression pattern of the HOX genes in the luminal and basal bladder cancers. **(B)** The box plot analysis of the HOX genes expression levels in the luminal and basal bladder cancers. **(C)** The proportion of luminal and basal bladder cancer cases with the up-regulated HOX genes. Asterisks indicate statistically significant difference (p value <0.05) based on Wilcoxon rank-sum test **(B)** and chi-squared test **(C)**; NS, not significant difference (p value ≥0.05).

**Table S1. Summary of clinical and pathological characterization of cystectomy specimens, related to Figure 1**

| Map #        | Age | Origin | Gender    | Occupation | Smoking Status           | Alcohol and Drugs | Other Diseases              | Family History                                         | Histologic Type of BC          | Stage | Grade | Molecular Type of BC | Growth | Number of samples collected |    |     |         |    |     |      | All samples |     |    |
|--------------|-----|--------|-----------|------------|--------------------------|-------------------|-----------------------------|--------------------------------------------------------|--------------------------------|-------|-------|----------------------|--------|-----------------------------|----|-----|---------|----|-----|------|-------------|-----|----|
|              |     |        |           |            |                          |                   |                             |                                                        |                                |       |       |                      |        | NU/LGIN                     |    |     | HGIN    |    |     | HGIN |             | UC  |    |
|              |     |        |           |            |                          |                   |                             |                                                        |                                |       |       |                      |        | NU                          | MD | MdD | NU/LGIN | SD | CIS |      |             |     |    |
| 1            | 16  | 71     | Caucasian | M          | Retired military         | Never smoker      | Occasional alcohol          | Arthritis                                              | Brother with pancreatic cancer | UC    | T4    | High                 | B      | Non-papillary               | 21 | 18  | 5       | 44 | 13  | 7    | 20          | 14  | 78 |
| 2            | 17  | 80     | Caucasian | M          | Educational consultant   | Former smoker     | 1-2 glasses of wine per day | Coronary artery disease, lip cancer, Parkinson disease | Brother with kidney cancer     | UC    | T2    | High                 | B      | Non-papillary               | 16 | 5   | 0       | 21 | 0   | 18   | 18          | 1   | 40 |
| 3            | 18  | 81     | Caucasian | M          | Retired military         | Former smoker     | None                        | Pneumonia, stroke, dementia<br>Prostate cancer         | Father with skin cancer        | UC    | T3    | High                 | L      | Papillary                   | 0  | 1   | 4       | 5  | 2   | 18   | 20          | 30  | 55 |
| 4            | 19  | 86     | Caucasian | M          | Retiree                  | Former smoker     | None                        | aortic aneurysm, pulmonary embolus                     | None                           | UC    | T3    | High                 | B      | Non-papillary               | 13 | 9   | 9       | 31 | 4   | 0    | 4           | 9   | 44 |
| 5            | 20  | 55     | Caucasian | M          | Lumber company worker    | Former smoker     | Occasional alcohol          | None                                                   | None                           | UC    | T2    | High                 | L      | Papillary                   | 14 | 13  | 11      | 38 | 2   | 0    | 2           | 2   | 42 |
| 6            | 21  | 69     | Caucasian | M          | Reiterd computer analyst | Never smoker      | None                        | Hypertension                                           | Mother with liver cancer       | UC    | T3    | High                 | L      | Non-papillary               | 7  | 9   | 13      | 29 | 1   | 0    | 1           | 15  | 45 |
| 7            | 22  | 73     | Caucasian | M          | Retired teacher          | Current smoker    | None                        | Coronary artery disease                                | None                           | UC    | T3    | High                 | L      | Non-papillary               | 0  | 3   | 6       | 9  | 5   | 13   | 18          | 7   | 34 |
| 8            | 23  | 79     | Caucasian | M          | Retired mill worker      | Former smoker     | None                        | Diabetes, hypertension                                 | Son with rectal cancer         | UC    | T2    | High                 | L      | Papillary                   | 8  | 7   | 7       | 22 | 1   | 0    | 1           | 18  | 41 |
| 9            | 24  | 68     | Caucasian | M          | Home builder             | Former smoker     | 2 glasses of wine per day   | Hypertension, glaucoma                                 | Mother with breast cancer      | UC    | T3    | High                 | L      | Non-papillary               | 32 | 4   | 8       | 44 | 3   | 3    | 6           | 4   | 54 |
| <b>Total</b> |     |        |           |            |                          |                   |                             |                                                        |                                |       |       |                      |        | 111                         | 69 | 63  | 243     | 31 | 59  | 90   | 100         | 433 |    |

BC, bladder cancer; M, male; UC, urothelial carcinoma; B, basal; L, luminal; NU, normal urothelium; MD, mild dysplasia; MdD, moderate dysplasia; CIS, carcinoma *in situ*; LGIN, low grade intraurothelial neoplasia; HGIN, high grade intraurothelial neoplasia



**Table S2. Number of Dysregulated Genes (RNASeq and Methylation) in Luminal (Map 24) and Basal (Map 19) Maps, related to Figure 2**

|                    | MAP 24 (Luminal)        |         |              | MAP 19 (Basal)          |          |              |
|--------------------|-------------------------|---------|--------------|-------------------------|----------|--------------|
|                    | Number of Altered Genes |         | Total        | Number of Altered Genes |          | Total        |
|                    | NU/LGIN                 | HGIN,UC |              | NU/LGIN                 | HGIN, UC |              |
| <b>RNAseq</b>      |                         |         |              |                         |          |              |
| Upregulated        | 1245                    | 1067    |              | 2017                    | 859      |              |
| Downregulated      | 163                     | 864     |              | 362                     | 327      |              |
| <b>Subtotal</b>    | 1408                    | 1931    | [3339]       | 2379                    | 1186     | [3565]       |
| <b>Methylation</b> |                         |         | <b>Total</b> |                         |          | <b>Total</b> |
| Hypermethylated    | 56                      | 340     |              | 254                     | 995      |              |
| Hypomethylated     | 69                      | 915     |              | 173                     | 236      |              |
| <b>Total</b>       | 125                     | 1255    | [1380]       | 427                     | 1231     | [1658]       |

**Table S3. Summary of Mutations Identified in Luminal and Basal Cystectomy Specimens, related to Figure 6**

|                                    | Luminal (MAP24) | Basal (MAP19) |
|------------------------------------|-----------------|---------------|
| <b>Cluster A</b>                   |                 |               |
| Non-silent mutations               | 1303            | 2176          |
| SNV                                | 1250            | 1924          |
| Insertions                         | 10              | 29            |
| Deletions                          | 43              | 223           |
| <b>Cluster B</b>                   |                 |               |
| Non-silent mutations               | 76              | 511           |
| SNV                                | 74              | 475           |
| Insertions                         | 1               | 6             |
| Deletions                          | 1               | 30            |
| <b>Cluster <math>\alpha</math></b> |                 |               |
| Non-silent mutations               | 80              | 43            |
| SNV                                | 77              | 41            |
| Insertions                         | 1               | 0             |
| Deletions                          | 2               | 2             |
| <b>Cluster <math>\beta</math></b>  |                 |               |
| Non-silent mutations               | 77              | 155           |
| SNV                                | 75              | 147           |
| Insertions                         | 1               | 1             |
| Deletions                          | 1               | 7             |

Table S4. List of Mutations in Cluster Alpha in the Luminal Map (Map 24), related to Figure 6

|    | Mutation                | Chr   | Start     | End       | Ref            | Alt | Protein_Change | Variant_Classification | Effect    | Mut_Type  | Mut_ID                  |
|----|-------------------------|-------|-----------|-----------|----------------|-----|----------------|------------------------|-----------|-----------|-------------------------|
| 1  | TMEM163:chr2:134718832  | chr2  | 134718832 | 134718832 | G              | A   | p.P35L         | Missense_Mutation      | nonsilent | SNV       | TMEM163:chr2:134718832  |
| 2  | PACS1:chr11:66070590    | chr11 | 66070590  | 66070590  | A              | C   | p.Q35P         | Missense_Mutation      | nonsilent | SNV       | PACS1:chr11:66070590    |
| 3  | ASB15:chr7:123617707    | chr7  | 123617707 | 123617707 | A              | C   | p.N141H        | Missense_Mutation      | nonsilent | SNV       | ASB15:chr7:123617707    |
| 4  | ASB15:chr7:123617682    | chr7  | 123617682 | 123617682 | A              | C   | p.E132D        | Missense_Mutation      | nonsilent | SNV       | ASB15:chr7:123617682    |
| 5  | PCDH10:chr4:133152499   | chr4  | 133152499 | 133152499 | A              | C   | p.I787L        | Missense_Mutation      | nonsilent | SNV       | PCDH10:chr4:133152499   |
| 6  | WDR33:chr2:127726703    | chr2  | 127726703 | 127726703 | G              | T   | p.Q267*        | Nonsense_Mutation      | null      | SNV       | WDR33:chr2:127726703    |
| 7  | MBTPS1:chr16:84091800   | chr16 | 84091800  | 84091800  | T              | G   | p.K299Q        | Missense_Mutation      | nonsilent | SNV       | MBTPS1:chr16:84091800   |
| 8  | UGT1A4:chr2:233718899   | chr2  | 233718899 | 233718899 | G              | T   | p.E27*         | Nonsense_Mutation      | null      | SNV       | UGT1A4:chr2:233718899   |
| 9  | UGT1A4:chr2:233719010   | chr2  | 233719010 | 233719010 | G              | A   | p.E64K         | Missense_Mutation      | nonsilent | SNV       | UGT1A4:chr2:233719010   |
| 10 | RECQL:chr12:21470988    | chr12 | 21470988  | 21470988  | G              | A   | p.S593F        | Missense_Mutation      | nonsilent | SNV       | RECQL:chr12:21470988    |
| 11 | OTOP1:chr4:419774       | chr4  | 419774    | 419774    | C              | T   | p.A364T        | Missense_Mutation      | nonsilent | SNV       | OTOP1:chr4:419774       |
| 12 | VSIG2:chr11:124750891   | chr11 | 124750891 | 124750891 | G              | A   | p.P84S         | Missense_Mutation      | nonsilent | SNV       | VSIG2:chr11:124750891   |
| 13 | SEPT14:chr7:55842957    | chr7  | 55842957  | 55842957  | C              | A   | p.K181N        | Missense_Mutation      | nonsilent | SNV       | SEPT14:chr7:55842957    |
| 14 | MARVELD3:chr16:71626363 | chr16 | 71626363  | 71626363  | G              | A   | p.R45Q         | Missense_Mutation      | nonsilent | SNV       | MARVELD3:chr16:71626363 |
| 15 | RB1:chr13:48465295      | chr13 | 48465295  | 48465295  | -              | T   | p.S807fs       | Frame_Shift_Ins        | null      | Insertion | RB1:chr13:48465295      |
| 16 | PKDREJ:chr22:46262713   | chr22 | 46262713  | 46262713  | C              | T   | p.V204I        | Missense_Mutation      | nonsilent | SNV       | PKDREJ:chr22:46262713   |
| 17 | CSDE1:chr1:114733742    | chr1  | 114733742 | 114733742 | C              | T   | p.S146N        | Missense_Mutation      | nonsilent | SNV       | CSDE1:chr1:114733742    |
| 18 | PLCB3:chr11:64267452    | chr11 | 64267452  | 64267452  | G              | A   | p.D1201N       | Missense_Mutation      | nonsilent | SNV       | PLCB3:chr11:64267452    |
| 19 | KITLG:chr12:88518810    | chr12 | 88518810  | 88518810  | T              | A   | p.L84F         | Missense_Mutation      | nonsilent | SNV       | KITLG:chr12:88518810    |
| 20 | CNBD1:chr8:87353727     | chr8  | 87353727  | 87353727  | G              | A   | p.C415Y        | Missense_Mutation      | nonsilent | SNV       | CNBD1:chr8:87353727     |
| 21 | IRS2:chr13:109785170    | chr13 | 109785170 | 109785170 | T              | A   | p.K295M        | Missense_Mutation      | nonsilent | SNV       | IRS2:chr13:109785170    |
| 22 | MMP1:chr11:102795539    | chr11 | 102795539 | 102795539 | T              | C   | p.I232V        | Missense_Mutation      | nonsilent | SNV       | MMP1:chr11:102795539    |
| 23 | TPTE:chr21:10596087     | chr21 | 10596087  | 10596087  | C              | T   | p.R426C        | Splice_Site            | null      | SNV       | TPTE:chr21:10596087     |
| 24 | SNAPC4:chr9:136381953   | chr9  | 136381953 | 136381953 | G              | A   | p.R730C        | Missense_Mutation      | nonsilent | SNV       | SNAPC4:chr9:136381953   |
| 25 | PCDH16:chr5:141184457   | chr5  | 141184457 | 141184457 | G              | T   | p.R633L        | Missense_Mutation      | nonsilent | SNV       | PCDH16:chr5:141184457   |
| 26 | TRAK2:chr2:201386338    | chr2  | 201386338 | 201386338 | C              | T   | p.E615K        | Missense_Mutation      | nonsilent | SNV       | TRAK2:chr2:201386338    |
| 27 | OR1E1:chr17:3397615     | chr17 | 3397615   | 3397615   | T              | C   | p.S266G        | Missense_Mutation      | nonsilent | SNV       | OR1E1:chr17:3397615     |
| 28 | IMPG1:chr6:75931152     | chr6  | 75931152  | 75931152  | C              | NA  | NA             | Splice_Site            | null      | SNV       | IMPG1:chr6:75931152     |
| 29 | VSIG1:chrX:108067099    | chrX  | 108067099 | 108067099 | G              | A   | p.G126D        | Missense_Mutation      | nonsilent | SNV       | VSIG1:chrX:108067099    |
| 30 | SAMS1:chr21:14498592    | chr21 | 14498592  | 14498592  | C              | A   | p.E257*        | Splice_Site            | null      | SNV       | SAMS1:chr21:14498592    |
| 31 | GPRI42:chr17:74372090   | chr17 | 74372090  | 74372090  | C              | G   | p.F293L        | Missense_Mutation      | nonsilent | SNV       | GPRI42:chr17:74372090   |
| 32 | SI4:chr14:60720380      | chr14 | 60720380  | 60720380  | T              | C   | p.H310R        | Missense_Mutation      | nonsilent | SNV       | SI4:chr14:60720380      |
| 33 | MYH4:chr17:10457566     | chr17 | 10457566  | 10457566  | T              | C   | p.H584R        | Missense_Mutation      | nonsilent | SNV       | MYH4:chr17:10457566     |
| 34 | KRTAP5-7:chr11:71527659 | chr11 | 71527659  | 71527659  | G              | A   | p.C120Y        | Missense_Mutation      | nonsilent | SNV       | KRTAP5-7:chr11:71527659 |
| 35 | INHBB:chr2:120349204    | chr2  | 120349204 | 120349204 | G              | A   | p.L185Q        | Missense_Mutation      | nonsilent | SNV       | INHBB:chr2:120349204    |
| 36 | MUC16:chr19:8885277     | chr19 | 8885277   | 8885277   | G              | NA  | NA             | Splice_Site            | null      | SNV       | MUC16:chr19:8885277     |
| 37 | ITGA7:chr12:55694808    | chr12 | 55694808  | 55694808  | G              | T   | p.H722Q        | Missense_Mutation      | nonsilent | SNV       | ITGA7:chr12:55694808    |
| 38 | ZNFS74:chr19:42080798   | chr19 | 42080798  | 42080798  | C              | G   | p.A731G        | Missense_Mutation      | nonsilent | SNV       | ZNFS74:chr19:42080798   |
| 39 | C12orf66:chr12:64194197 | chr12 | 64194197  | 64194197  | T              | A   | p.H328L        | Missense_Mutation      | nonsilent | SNV       | C12orf66:chr12:64194197 |
| 40 | COP55:chr8:67059360     | chr8  | 67059360  | 67059360  | C              | T   | p.V13M         | Missense_Mutation      | nonsilent | SNV       | COP55:chr8:67059360     |
| 41 | POU2AF1:chr11:111357545 | chr11 | 111357545 | 111357545 | G              | A   | p.S119L        | Missense_Mutation      | nonsilent | SNV       | POU2AF1:chr11:111357545 |
| 42 | OPRD1:chr1:28862856     | chr1  | 28862856  | 28862856  | T              | A   | p.V231E        | Missense_Mutation      | nonsilent | SNV       | OPRD1:chr1:28862856     |
| 43 | RPGRIP1L:chr16:53637725 | chr16 | 53637725  | 53637725  | C              | C   | p.T1030A       | Missense_Mutation      | nonsilent | SNV       | RPGRIP1L:chr16:53637725 |
| 44 | SASH1:chr6:148544104    | chr6  | 148544104 | 148544104 | G              | C   | p.K878N        | Missense_Mutation      | nonsilent | SNV       | SASH1:chr6:148544104    |
| 45 | IGFN1:chr1:201206758    | chr1  | 201206758 | 201206758 | C              | T   | p.P622L        | Missense_Mutation      | nonsilent | SNV       | IGFN1:chr1:201206758    |
| 46 | ATG4C:chr1:62834116     | chr1  | 62834116  | 62834116  | G              | C   | p.D338H        | Splice_Site            | null      | SNV       | ATG4C:chr1:62834116     |
| 47 | C11orf80:chr11:66756380 | chr11 | 66756380  | 66756380  | C              | T   | p.P66L         | Missense_Mutation      | nonsilent | SNV       | C11orf80:chr11:66756380 |
| 48 | MYO18B:chr22:25823622   | chr22 | 25823622  | 25823622  | A              | T   | p.Q880L        | Missense_Mutation      | nonsilent | SNV       | MYO18B:chr22:25823622   |
| 49 | CEACAM7:chr19:41677414  | chr19 | 41677414  | 41677414  | A              | G   | p.*266Q        | Nonstop_Mutation       | null      | SNV       | CEACAM7:chr19:41677414  |
| 50 | ZAP70:chr2:97732905     | chr2  | 97732905  | 97732918  | GGCACATACGCCCT | -   | p.G196fs       | Frame_Shift_Del        | null      | Deletion  | ZAP70:chr2:97732905     |
| 51 | SH3RF2:chr5:146013951   | chr5  | 146013951 | 146013951 | G              | A   | p.G317R        | Missense_Mutation      | nonsilent | SNV       | SH3RF2:chr5:146013951   |
| 52 | DPYD:chr1:97549639      | chr1  | 97549639  | 97549639  | P              | A   | p.V482A        | Missense_Mutation      | nonsilent | SNV       | DPYD:chr1:97549639      |
| 53 | NCAPG2:chr7:158652293   | chr7  | 158652293 | 158652293 | C              | G   | p.R978R        | Splice_Site            | null      | SNV       | NCAPG2:chr7:158652293   |
| 54 | FGF10:chr5:44388576     | chr5  | 44388576  | 44388576  | G              | A   | p.T36I         | Missense_Mutation      | nonsilent | SNV       | FGF10:chr5:44388576     |
| 55 | FAT3:chr11:92840649     | chr11 | 92840649  | 92840649  | A              | G   | p.I3336V       | Missense_Mutation      | nonsilent | SNV       | FAT3:chr11:92840649     |
| 56 | TNN:chr1:17507743       | chr1  | 17507743  | 17507743  | C              | A   | p.L109M        | Missense_Mutation      | nonsilent | SNV       | TNN:chr1:17507743       |
| 57 | GNAS:chr20:58854895     | chr20 | 58854895  | 58854895  | C              | T   | p.R544W        | Missense_Mutation      | nonsilent | SNV       | GNAS:chr20:58854895     |
| 58 | USP8:chr15:50495917     | chr15 | 50495917  | 50495917  | G              | A   | p.A804T        | Missense_Mutation      | nonsilent | SNV       | USP8:chr15:50495917     |
| 59 | GRXCR2:chr5:145866507   | chr5  | 145866507 | 145866507 | C              | C   | p.Y186*        | Nonsense_Mutation      | null      | SNV       | GRXCR2:chr5:145866507   |
| 60 | TBL1Y:chrY:7063918      | chrY  | 7063918   | 7063918   | C              | T   | p.R76C         | Missense_Mutation      | nonsilent | SNV       | TBL1Y:chrY:7063918      |
| 61 | PIGB:chr15:55350844     | chr15 | 55350844  | 55350844  | C              | A   | p.Y423*        | Nonsense_Mutation      | null      | SNV       | PIGB:chr15:55350844     |
| 62 | RNF32:chr7:156675744    | chr7  | 156675744 | 156675744 | G              | T   | p.E245*        | Nonsense_Mutation      | null      | SNV       | RNF32:chr7:156675744    |
| 63 | OR5M10:chr11:56577516   | chr11 | 56577516  | 56577516  | A              | G   | p.V69A         | Missense_Mutation      | nonsilent | SNV       | OR5M10:chr11:56577516   |
| 64 | ADGB:chr6:146764102     | chr6  | 146764102 | 146764102 | C              | NA  | NA             | Splice_Site            | null      | SNV       | ADGB:chr6:146764102     |
| 65 | ZNF645:chrX:22274249    | chrX  | 22274249  | 22274249  | A              | G   | p.R420G        | Missense_Mutation      | nonsilent | SNV       | ZNF645:chrX:22274249    |
| 66 | ABCC9:chr12:21817195    | chr12 | 21817195  | 21817195  | C              | G   | p.G1295D       | Missense_Mutation      | nonsilent | SNV       | ABCC9:chr12:21817195    |
| 67 | DSG4:chr18:31411348     | chr18 | 31411348  | 31411348  | C              | G   | p.A752G        | Missense_Mutation      | nonsilent | SNV       | DSG4:chr18:31411348     |
| 68 | SLC27A6:chr5:129016036  | chr5  | 129016036 | 129016036 | C              | T   | p.T374I        | Missense_Mutation      | nonsilent | SNV       | SLC27A6:chr5:129016036  |
| 69 | FAM199X:chrX:104188281  | chrX  | 104188281 | 104188281 | C              | A   | p.A324E        | Missense_Mutation      | nonsilent | SNV       | FAM199X:chrX:104188281  |
| 70 | ASXL3:chr18:33740213    | chr18 | 33740213  | 33740213  | T              | A   | p.S937T        | Missense_Mutation      | nonsilent | SNV       | ASXL3:chr18:33740213    |
| 71 | KRT71:chr12:52548701    | chr12 | 52548701  | 52548701  | G              | A   | p.A271A        | Splice_Site            | null      | SNV       | KRT71:chr12:52548701    |
| 72 | DOCK7:chr1:62578916     | chr1  | 62578916  | 62578916  | G              | T   | p.T641N        | Missense_Mutation      | nonsilent | SNV       | DOCK7:chr1:62578916     |
| 73 | CACNA1A:chr19:13208878  | chr19 | 13208878  | 13208880  | GAT            | -   | p.H2219del     | In_Frame_Del           | null      | Deletion  | CACNA1A:chr19:13208878  |
| 74 | MUC6:chr11:1016770      | chr11 | 1016770   | 1016770   | G              | A   | p.P2015S       | Missense_Mutation      | nonsilent | SNV       | MUC6:chr11:1016770      |
| 75 | KIF18A:chr11:28088712   | chr11 | 28088712  | 28088712  | G              | A   | p.R237*        | Nonsense_Mutation      | null      | SNV       | KIF18A:chr11:28088712   |
| 76 | NRXN1:chr2:50053527     | chr2  | 50053527  | 50053527  | T              | G   | p.Q1331P       | Missense_Mutation      | nonsilent | SNV       | NRXN1:chr2:50053527     |
| 77 | FAM47A:chrX:34130558    | chrX  | 34130558  | 34130558  | T              | A   | p.K574M        | Missense_Mutation      | nonsilent | SNV       | FAM47A:chrX:34130558    |
| 78 | FAXC:chr6:99323536      | chr6  | 99323536  | 99323536  | C              | T   | p.R244H        | Missense_Mutation      | nonsilent | SNV       | FAXC:chr6:99323536      |
| 79 | DNAH9:chr17:11854013    | chr17 | 11854013  | 11854013  | A              | A   | p.T3173K       | Missense_Mutation      | nonsilent | SNV       | DNAH9:chr17:11854013    |
| 80 | RASGRF1:chr15:79058468  | chr15 | 79058468  | 79058468  | C              | T   | p.A133T        | Missense_Mutation      | nonsilent | SNV       | RASGRF1:chr15:79058468  |

Table S5. List of Mutations in Cluster Alpha in the Basal Map (Map 19), related to Figure 6

| Mutation                       | Chr   | Start     | End       | Ref      | Alt | Protein_C |  | Variant_Classification | Effect    | Mut_Type  | Mut_ID                      |
|--------------------------------|-------|-----------|-----------|----------|-----|-----------|--|------------------------|-----------|-----------|-----------------------------|
|                                |       |           |           |          |     | hange     |  |                        |           |           |                             |
| 1 FLNC:chr7:128842686          | chr7  | 128842686 | 128842686 | G        | T   | p.E793*   |  | Nonsense_Mutation      | null      | SNV       | FLNC:chr7:128842686         |
| 2 ERCC2:chr19:45364429         | chr19 | 45364429  | 45364429  | T        | C   | p.N238S   |  | Missense_Mutation      | nonsilent | SNV       | ERCC2:chr19:45364429        |
| 3 TIMMDC1:chr3:119498789       | chr3  | 119498789 | 119498789 | T        | G   | p.F19C    |  | Missense_Mutation      | nonsilent | SNV       | TIMMDC1:chr3:119498789      |
| 4 VCX3B:chrX:8466330           | chrX  | 8466330   | 8466330   | A        | G   | p.M230V   |  | Missense_Mutation      | nonsilent | SNV       | VCX3B:chrX:8466330          |
| 5 ZMIZ1:chr10:79292307         | chr10 | 79292307  | 79292307  | T        | A   | p.V303E   |  | Missense_Mutation      | nonsilent | SNV       | ZMIZ1:chr10:79292307        |
| 6 CACNB2:chr10:18538203        | chr10 | 18538203  | 18538203  | T        | G   | p.D414E   |  | Missense_Mutation      | nonsilent | SNV       | CACNB2:chr10:18538203       |
| 7 SPAG1:chr8:100220398         | chr8  | 100220398 | 100220398 | G        | A   | p.C552Y   |  | Missense_Mutation      | nonsilent | SNV       | SPAG1:chr8:100220398        |
| 8 PRR22:chr19:5783829          | chr19 | 5783829   | 5783829   | G        | C   | p.P140A   |  | Missense_Mutation      | nonsilent | SNV       | PRR22:chr19:5783829         |
| 9 LRRK2:chr12:40259572         | chr12 | 40259572  | 40259572  | C        | T   | p.A504V   |  | Missense_Mutation      | nonsilent | SNV       | LRRK2:chr12:40259572        |
| 10 IWS1:chr2:127505742         | chr2  | 127505742 | 127505742 | C        | A   | p.S54I    |  | Missense_Mutation      | nonsilent | SNV       | IWS1:chr2:127505742         |
| 11 ACIN1:chr14:23080168        | chr14 | 23080168  | 23080168  | -        | G   | p.V448fs  |  | Frame_Shift_Ins        | null      | Insertion | ACIN1:chr14:23080168        |
| 12 XKR6:chr8:11200724          | chr8  | 11200724  | 11200725  | -        | G   | p.M206fs  |  | Frame_Shift_Ins        | null      | Insertion | XKR6:chr8:11200724          |
| 13 WDH1:chr14:54944459         | chr14 | 54944459  | 54944459  | C        | T   | p.G1021E  |  | Missense_Mutation      | nonsilent | SNV       | WDH1:chr14:54944459         |
| 14 CLMN:chr14:95203283         | chr14 | 95203283  | 95203283  | C        | T   | p.S689N   |  | Missense_Mutation      | nonsilent | SNV       | CLMN:chr14:95203283         |
| 15 SERPINA3:chr14:94619419     | chr14 | 94619419  | 94619420  | AT       | CA  | p.M290Q   |  | Missense_Mutation      | nonsilent | SNV       | SERPINA3:chr14:94619419     |
| 16 RP11-51L5.4:chr17:62260772  | chr17 | 62260772  | 62260772  | A        | G   | NA        |  | Splice_Site            | null      | SNV       | RP11-51L5.4:chr17:62260772  |
| 17 RP11-402P6.15:chrX:71670304 | chrX  | 71670304  | 71670305  | GC       | AT  | p.Q481*   |  | Nonsense_Mutation      | null      | SNV       | RP11-402P6.15:chrX:71670304 |
| 18 RP11-402P6.15:chrX:71668128 | chrX  | 71668128  | 71668128  | C        | A   | p.P109T   |  | Missense_Mutation      | nonsilent | SNV       | RP11-402P6.15:chrX:71668128 |
| 19 RP11-402P6.15:chrX:71668120 | chrX  | 71668120  | 71668120  | C        | T   | p.A106V   |  | Missense_Mutation      | nonsilent | SNV       | RP11-402P6.15:chrX:71668120 |
| 20 PPIP5K1:chr15:43536239      | chr15 | 43536239  | 43536240  | CA       | TG  | p.C1105H  |  | Missense_Mutation      | nonsilent | SNV       | PIPIP5K1:chr15:43536239     |
| 21 OR1S1:chr11:58215638        | chr11 | 58215638  | 58215638  | A        | G   | p.I285M   |  | Missense_Mutation      | nonsilent | SNV       | OR1S1:chr11:58215638        |
| 22 OR7E36P:chr13:41431248      | chr13 | 41431248  | 41431249  | -        | AAG | NA        |  | Splice_Site            | null      | Insertion | OR7E36P:chr13:41431248      |
| 23 OR1S1:chr11:58215047        | chr11 | 58215047  | 58215047  | G        | C   | p.K88N    |  | Missense_Mutation      | nonsilent | SNV       | OR1S1:chr11:58215047        |
| 24 OTOG:chr11:17593745         | chr11 | 17593745  | 17593745  | C        | T   | p.P1093S  |  | Missense_Mutation      | nonsilent | SNV       | OTOG:chr11:17593745         |
| 25 TNFRSF14:chr1:2561679       | chr1  | 2561679   | 2561679   | C        | G   | p.S186R   |  | Missense_Mutation      | nonsilent | SNV       | TNFRSF14:chr1:2561679       |
| 26 KIAA1671:chr22:25177409     | chr22 | 25177409  | 25177409  | G        | A   | p.R1654H  |  | Missense_Mutation      | nonsilent | SNV       | KIAA1671:chr22:25177409     |
| 27 GRIP2:chr3:14540271         | chr3  | 14540271  | 14540271  | G        | A   | p.A13V    |  | Missense_Mutation      | nonsilent | SNV       | GRIP2:chr3:14540271         |
| 28 DIP2C:chr10:399191          | chr10 | 399191    | 399191    | G        | A   | p.P393L   |  | Missense_Mutation      | nonsilent | SNV       | DIP2C:chr10:399191          |
| 29 RNF34:chr12:121416160       | chr12 | 121416160 | 121416160 | C        | T   | p.A3V     |  | Splice_Site            | null      | SNV       | RNF34:chr12:121416160       |
| 30 SF3B1:chr2:197400743        | chr2  | 197400743 | 197400743 | A        | C   | p.L897R   |  | Missense_Mutation      | nonsilent | SNV       | SF3B1:chr2:197400743        |
| 31 STKLD1:chr9:133403800       | chr9  | 133403800 | 133403800 | C        | A   | p.C525*   |  | Nonsense_Mutation      | null      | SNV       | STKLD1:chr9:133403800       |
| 32 ZNF318:chr6:43368972        | chr6  | 43368972  | 43368979  | TGCCGCTG | -   | p.D129fs  |  | Frame_Shift_Del        | null      | Deletion  | ZNF318:chr6:43368972        |
| 33 ARSE:chrX:2949610           | chrX  | 2949610   | 2949610   | C        | T   | p.R183H   |  | Missense_Mutation      | nonsilent | SNV       | ARSE:chrX:2949610           |
| 34 RP11-683L23.1:chr18:48009   | chr18 | 48009     | 48009     | C        | T   | p.C239Y   |  | Missense_Mutation      | nonsilent | SNV       | RP11-683L23.1:chr18:48009   |
| 35 CLDN9:chr16:3013447         | chr16 | 3013447   | 3013447   | C        | A   | p.L29M    |  | Missense_Mutation      | nonsilent | SNV       | CLDN9:chr16:3013447         |
| 36 ZC3H7B:chr22:41320707       | chr22 | 41320707  | 41320707  | T        | A   | p.F16Y    |  | Missense_Mutation      | nonsilent | SNV       | ZC3H7B:chr22:41320707       |
| 37 ARAP2:chr4:36148419         | chr4  | 36148419  | 36148419  | C        | A   | p.E996*   |  | Nonsense_Mutation      | null      | SNV       | ARAP2:chr4:36148419         |
| 38 RBMXL3:chrX:115191182       | chrX  | 115191182 | 115191183 | CA       | TG  | p.Q581W   |  | Missense_Mutation      | nonsilent | SNV       | RBMXL3:chrX:115191182       |
| 39 RBMXL3:chrX:115191188       | chrX  | 115191188 | 115191188 | A        | C   | p.N583H   |  | Missense_Mutation      | nonsilent | SNV       | RBMXL3:chrX:115191188       |
| 40 TMED7:chr5:115625789        | chr5  | 115625789 | 115625789 | G        | A   | p.P2S     |  | Missense_Mutation      | nonsilent | SNV       | TMED7:chr5:115625789        |
| 41 SLC27A6:chr5:129029625      | chr5  | 129029625 | 129029625 | C        | A   | p.T534K   |  | Missense_Mutation      | nonsilent | SNV       | SLC27A6:chr5:129029625      |
| 42 LGSN:chr6:63280565          | chr6  | 63280565  | 63280565  | C        | A   | p.C329F   |  | Missense_Mutation      | nonsilent | SNV       | LGSN:chr6:63280565          |
| 43 EIF3D:chr22:36519493        | chr22 | 36519493  | 36519493  | C        | T   | p.R208H   |  | Missense_Mutation      | nonsilent | SNV       | EIF3D:chr22:36519493        |



Table S6. List of Mutations in Cluster Beta in the Luminal Map (Map 24), related to Figure 6

|    | Mutation                 | Chr   | Start    | End      | Ref | Alt | Protein_Change | Variant_Classification | Effect    | Mut_Type  | Mut_ID                   |
|----|--------------------------|-------|----------|----------|-----|-----|----------------|------------------------|-----------|-----------|--------------------------|
| 1  | MAGEA4:chrX:151924617    | chrX  | 1.52E+08 | 1.52E+08 | G   | C   | p.*318S        | Nonstop_Mutation       | null      | SNV       | MAGEA4:chrX:151924617    |
| 2  | EMC9:chr14:24139634      | chr14 | 24139634 | 24139634 | G   | C   | p.L12V         | Missense_Mutation      | nonsilent | SNV       | EMC9:chr14:24139634      |
| 3  | SCUBE2:chr11:9047414     | chr11 | 9047414  | 9047415  | TG  | -   | p.T648fs       | Frame_Shift_Del        | null      | Deletion  | SCUBE2:chr11:9047414     |
| 4  | BAP1:chr3:52403766       | chr3  | 52403766 | 52403766 | G   | C   | p.S460*        | Nonsense_Mutation      | null      | SNV       | BAP1:chr3:52403766       |
| 5  | NEUROD1:chr2:181678217   | chr2  | 1.82E+08 | 1.82E+08 | G   | C   | p.P215R        | Missense_Mutation      | nonsilent | SNV       | NEUROD1:chr2:181678217   |
| 6  | NCAM1:chr11:113255947    | chr11 | 1.13E+08 | 1.13E+08 | C   | G   | p.I623M        | Missense_Mutation      | nonsilent | SNV       | NCAM1:chr11:113255947    |
| 7  | C5orf42:chr5:37226683    | chr5  | 37226683 | 37226683 | G   | T   | p.Q638K        | Missense_Mutation      | nonsilent | SNV       | C5orf42:chr5:37226683    |
| 8  | TMEFF1:chr9:100572613    | chr9  | 1.01E+08 | 1.01E+08 | T   | C   | p.I332T        | Missense_Mutation      | nonsilent | SNV       | TMEFF1:chr9:100572613    |
| 9  | ADAMTSL1:chr9:18622334   | chr9  | 18622334 | 18622334 | G   | A   | p.R189Q        | Missense_Mutation      | nonsilent | SNV       | ADAMTSL1:chr9:18622334   |
| 10 | GLRA1:chr5:151851604     | chr5  | 1.52E+08 | 1.52E+08 | C   | G   | p.G233A        | Splice_Site            | null      | SNV       | GLRA1:chr5:151851604     |
| 11 | ABCC8:chr11:17413399     | chr11 | 17413399 | 17413399 | C   | T   | p.E824K        | Missense_Mutation      | nonsilent | SNV       | ABCC8:chr11:17413399     |
| 12 | APC:chr5:112839465       | chr5  | 1.13E+08 | 1.13E+08 | C   | T   | p.Q1291*       | Nonsense_Mutation      | null      | SNV       | APC:chr5:112839465       |
| 13 | IRAK1:chrX:154019788     | chrX  | 1.54E+08 | 1.54E+08 | C   | T   | p.E9K          | Missense_Mutation      | nonsilent | SNV       | IRAK1:chrX:154019788     |
| 14 | BSN:chr3:49651075        | chr3  | 49651075 | 49651075 | C   | A   | p.A661E        | Missense_Mutation      | nonsilent | SNV       | BSN:chr3:49651075        |
| 15 | DGAT2:chr11:75798366     | chr11 | 75798366 | 75798366 | C   | T   | p.R317*        | Nonsense_Mutation      | null      | SNV       | DGAT2:chr11:75798366     |
| 16 | ALOX5:chr10:45443465     | chr10 | 45443465 | 45443465 | G   | C   | p.E501Q        | Missense_Mutation      | nonsilent | SNV       | ALOX5:chr10:45443465     |
| 17 | PCDH9:chr13:66304893     | chr13 | 66304893 | 66304893 | G   | C   | p.S1159L       | Missense_Mutation      | nonsilent | SNV       | PCDH9:chr13:66304893     |
| 18 | FPR1:chr19:51746492      | chr19 | 51746492 | 51746492 | G   | A   | p.P168L        | Missense_Mutation      | nonsilent | SNV       | FPR1:chr19:51746492      |
| 19 | C10orf71:chr10:49324658  | chr10 | 49324658 | 49324658 | G   | A   | p.E705K        | Missense_Mutation      | nonsilent | SNV       | C10orf71:chr10:49324658  |
| 20 | CDKN1A:chr6:36684429     | chr6  | 36684429 | 36684430 | -   | A   | p.H110fs       | Frame_Shift_Ins        | null      | Insertion | CDKN1A:chr6:36684429     |
| 21 | ADAMTSL17:chr15:99997486 | chr15 | 99997486 | 99997486 | C   | T   | p.A899T        | Missense_Mutation      | nonsilent | SNV       | ADAMTSL17:chr15:99997486 |
| 22 | USP28:chr11:113823688    | chr11 | 1.14E+08 | 1.14E+08 | C   | G   | p.R400S        | Missense_Mutation      | nonsilent | SNV       | USP28:chr11:113823688    |
| 23 | MUC5B:chr11:1248411      | chr11 | 1248411  | 1248411  | C   | A   | p.T3844N       | Missense_Mutation      | nonsilent | SNV       | MUC5B:chr11:1248411      |
| 24 | PRRC2A:chr6:31632385     | chr6  | 31632385 | 31632385 | G   | C   | p.E1238Q       | Missense_Mutation      | nonsilent | SNV       | PRRC2A:chr6:31632385     |
| 25 | C5orf42:chr5:37226785    | chr5  | 37226785 | 37226785 | G   | A   | p.H604Y        | Missense_Mutation      | nonsilent | SNV       | C5orf42:chr5:37226785    |
| 26 | FIGN:chr2:163610118      | chr2  | 1.64E+08 | 1.64E+08 | G   | T   | p.L572I        | Missense_Mutation      | nonsilent | SNV       | FIGN:chr2:163610118      |
| 27 | UGGT1:chr2:128113209     | chr2  | 1.28E+08 | 1.28E+08 | C   | G   | p.S216*        | Nonsense_Mutation      | null      | SNV       | UGGT1:chr2:128113209     |
| 28 | ITGAV:chr2:186625495     | chr2  | 1.87E+08 | 1.87E+08 | G   | A   | p.W144*        | Nonsense_Mutation      | null      | SNV       | ITGAV:chr2:186625495     |
| 29 | CROCC:chr1:16966080      | chr1  | 16966080 | 16966080 | G   | A   | p.A1553T       | Missense_Mutation      | nonsilent | SNV       | CROCC:chr1:16966080      |
| 30 | XPO7:chr8:22003299       | chr8  | 22003299 | 22003299 | G   | C   | p.L1008F       | Missense_Mutation      | nonsilent | SNV       | XPO7:chr8:22003299       |
| 31 | ZCCHC11:chr1:52481843    | chr1  | 52481843 | 52481843 | C   | G   | p.Q532H        | Missense_Mutation      | nonsilent | SNV       | ZCCHC11:chr1:52481843    |
| 32 | PLA2G4D:chr15:42070059   | chr15 | 42070059 | 42070059 | C   | T   | p.G694R        | Missense_Mutation      | nonsilent | SNV       | PLA2G4D:chr15:42070059   |
| 33 | SCAPER:chr15:76348651    | chr15 | 76348651 | 76348651 | C   | G   | p.L1395F       | Missense_Mutation      | nonsilent | SNV       | SCAPER:chr15:76348651    |
| 34 | HERC1:chr15:63666389     | chr15 | 63666389 | 63666389 | G   | C   | p.L2764V       | Missense_Mutation      | nonsilent | SNV       | HERC1:chr15:63666389     |
| 35 | ADAM12:chr10:126049362   | chr10 | 1.26E+08 | 1.26E+08 | G   | A   | p.P606L        | Missense_Mutation      | nonsilent | SNV       | ADAM12:chr10:126049362   |
| 36 | MAS1:chr6:159907088      | chr6  | 1.6E+08  | 1.6E+08  | G   | A   | p.V45M         | Missense_Mutation      | nonsilent | SNV       | MAS1:chr6:159907088      |
| 37 | GPR63:chr6:96798634      | chr6  | 96798634 | 96798634 | C   | G   | p.L366F        | Missense_Mutation      | nonsilent | SNV       | GPR63:chr6:96798634      |
| 38 | ENPEP:chr4:110476761     | chr4  | 1.1E+08  | 1.1E+08  | C   | T   | p.T116M        | Missense_Mutation      | nonsilent | SNV       | ENPEP:chr4:110476761     |
| 39 | FBXW7:chr4:152337818     | chr4  | 1.52E+08 | 1.52E+08 | G   | C   | p.S202*        | Nonsense_Mutation      | null      | SNV       | FBXW7:chr4:152337818     |
| 40 | PPP1R12A:chr12:79795669  | chr12 | 79795669 | 79795669 | C   | T   | p.R851K        | Missense_Mutation      | nonsilent | SNV       | PPP1R12A:chr12:79795669  |
| 41 | GLTSCR2:chr19:47755416   | chr19 | 47755416 | 47755416 | C   | G   | p.I374M        | Missense_Mutation      | nonsilent | SNV       | GLTSCR2:chr19:47755416   |
| 42 | SCARF1:chr17:1643670     | chr17 | 1643670  | 1643670  | C   | T   | p.R188H        | Missense_Mutation      | nonsilent | SNV       | SCARF1:chr17:1643670     |
| 43 | SUPV3L1:chr10:69189317   | chr10 | 69189317 | 69189317 | C   | T   | p.P208L        | Missense_Mutation      | nonsilent | SNV       | SUPV3L1:chr10:69189317   |
| 44 | FAN1:chr15:30905493      | chr15 | 30905493 | 30905493 | C   | G   | p.S277C        | Missense_Mutation      | nonsilent | SNV       | FAN1:chr15:30905493      |
| 45 | TBC1D32:chr6:121131690   | chr6  | 1.21E+08 | 1.21E+08 | C   | G   | p.E987Q        | Missense_Mutation      | nonsilent | SNV       | TBC1D32:chr6:121131690   |
| 46 | GLB1L3:chr11:134277852   | chr11 | 1.34E+08 | 1.34E+08 | G   | A   | p.R101K        | Missense_Mutation      | nonsilent | SNV       | GLB1L3:chr11:134277852   |
| 47 | CST11:chr20:23452691     | chr20 | 23452691 | 23452691 | C   | G   | p.E41Q         | Missense_Mutation      | nonsilent | SNV       | CST11:chr20:23452691     |
| 48 | ZSWIM1:chr20:45884033    | chr20 | 45884033 | 45884033 | G   | C   | p.E481Q        | Missense_Mutation      | nonsilent | SNV       | ZSWIM1:chr20:45884033    |
| 49 | RBBP8NL:chr20:62414348   | chr20 | 62414348 | 62414348 | C   | G   | p.E335Q        | Missense_Mutation      | nonsilent | SNV       | RBBP8NL:chr20:62414348   |
| 50 | BRAF:chr7:140781611      | chr7  | 1.41E+08 | 1.41E+08 | C   | T   | p.G466E        | Missense_Mutation      | nonsilent | SNV       | BRAF:chr7:140781611      |
| 51 | IFT80:chr3:160319905     | chr3  | 1.6E+08  | 1.6E+08  | C   | T   | p.S271N        | Missense_Mutation      | nonsilent | SNV       | IFT80:chr3:160319905     |
| 52 | MUC16:chr19:8937521      | chr19 | 8937521  | 8937521  | G   | T   | p.T1145*       | Nonsense_Mutation      | null      | SNV       | MUC16:chr19:8937521      |
| 53 | PLCE1:chr10:94313273     | chr10 | 94313273 | 94313273 | G   | C   | p.R2008T       | Missense_Mutation      | nonsilent | SNV       | PLCE1:chr10:94313273     |
| 54 | ARPC4:chr3:9803843       | chr3  | 9803843  | 9803843  | G   | A   | p.G111R        | Splice_Site            | null      | SNV       | ARPC4:chr3:9803843       |
| 55 | LRP1:chr12:57192941      | chr12 | 57192941 | 57192941 | G   | A   | p.R2509Q       | Missense_Mutation      | nonsilent | SNV       | LRP1:chr12:57192941      |
| 56 | OGG1:chr3:9751889        | chr3  | 9751889  | 9751889  | C   | T   | p.R169W        | Missense_Mutation      | nonsilent | SNV       | OGG1:chr3:9751889        |
| 57 | PRKD3:chr2:37316467      | chr2  | 37316467 | 37316467 | G   | C   | p.P20A         | Missense_Mutation      | nonsilent | SNV       | PRKD3:chr2:37316467      |
| 58 | PRKD3:chr2:37316242      | chr2  | 37316242 | 37316242 | G   | C   | p.Q95E         | Missense_Mutation      | nonsilent | SNV       | PRKD3:chr2:37316242      |
| 59 | PLEKHM1:chr17:45458393   | chr17 | 45458393 | 45458393 | C   | A   | p.R452L        | Missense_Mutation      | nonsilent | SNV       | PLEKHM1:chr17:45458393   |
| 60 | RCC1:chr1:28532243       | chr1  | 28532243 | 28532243 | C   | T   | p.R112S        | Missense_Mutation      | nonsilent | SNV       | RCC1:chr1:28532243       |
| 61 | NELL2:chr12:44779966     | chr12 | 44779966 | 44779966 | G   | A   | p.S131L        | Missense_Mutation      | nonsilent | SNV       | NELL2:chr12:44779966     |
| 62 | DYRK4:chr12:4604947      | chr12 | 4604947  | 4604947  | C   | T   | p.S272F        | Missense_Mutation      | nonsilent | SNV       | DYRK4:chr12:4604947      |
| 63 | ATP2B1:chr12:89655717    | chr12 | 89655717 | 89655717 | T   | C   | p.Y57C         | Missense_Mutation      | nonsilent | SNV       | ATP2B1:chr12:89655717    |
| 64 | KIF2B:chr17:53823520     | chr17 | 53823520 | 53823520 | C   | T   | p.R163C        | Missense_Mutation      | nonsilent | SNV       | KIF2B:chr17:53823520     |
| 65 | ADGRL3:chr4:62063565     | chr4  | 62063565 | 62063565 | C   | A   | p.P1292H       | Missense_Mutation      | nonsilent | SNV       | ADGRL3:chr4:62063565     |
| 66 | ZFYVE9:chr1:52266657     | chr1  | 52266657 | 52266657 | C   | G   | p.Q761E        | Missense_Mutation      | nonsilent | SNV       | ZFYVE9:chr1:52266657     |
| 67 | TRIM62:chr1:33147393     | chr1  | 33147393 | 33147393 | C   | T   | p.W283*        | Nonsense_Mutation      | null      | SNV       | TRIM62:chr1:33147393     |
| 68 | TMPRSS11B:chr4:68234565  | chr4  | 68234565 | 68234565 | C   | T   | p.E123K        | Missense_Mutation      | nonsilent | SNV       | TMPRSS11B:chr4:68234565  |
| 69 | TIGD7:chr16:3299119      | chr16 | 3299119  | 3299119  | C   | G   | p.R499T        | Missense_Mutation      | nonsilent | SNV       | TIGD7:chr16:3299119      |
| 70 | DLX4:chr17:49973080      | chr17 | 49973080 | 49973080 | G   | C   | p.E97D         | Missense_Mutation      | nonsilent | SNV       | DLX4:chr17:49973080      |
| 71 | CCDC17:chr1:45623902     | chr1  | 45623902 | 45623902 | G   | A   | p.S3F          | Missense_Mutation      | nonsilent | SNV       | CCDC17:chr1:45623902     |
| 72 | CLUH:chr17:2703463       | chr17 | 2703463  | 2703463  | C   | G   | p.E72D         | Missense_Mutation      | nonsilent | SNV       | CLUH:chr17:2703463       |
| 73 | HS3T6:chr16:1911844      | chr16 | 1911844  | 1911844  | C   | A   | p.E259*        | Nonsense_Mutation      | null      | SNV       | HS3T6:chr16:1911844      |
| 74 | ANHX:chr12:133231629     | chr12 | 1.33E+08 | 1.33E+08 | C   | T   | p.G89R         | Missense_Mutation      | nonsilent | SNV       | ANHX:chr12:133231629     |
| 75 | ATP8B3:chr19:1800082     | chr19 | 1800082  | 1800082  | C   | T   | p.V473M        | Missense_Mutation      | nonsilent | SNV       | ATP8B3:chr19:1800082     |
| 76 | CYP2C19:chr10:94842987   | chr10 | 94842987 | 94842987 | C   | T   | p.T371I        | Missense_Mutation      | nonsilent | SNV       | CYP2C19:chr10:94842987   |
| 77 | MFAP1:chr15:43812994     | chr15 | 43812994 | 43812994 | G   | C   | p.R294G        | Missense_Mutation      | nonsilent | SNV       | MFAP1:chr15:43812994     |

Table S8. List of mutations in Map24 and Map19 ( $\alpha$  and  $\beta$  clusters) validated by PCR-based Sanger sequencing, related to Figure 7

| Cluster                  | Gene    | Mutation               | Mutation call | Sequencing results | Primers                                                                                    | Protein Change | Variant Classification | Effect    |
|--------------------------|---------|------------------------|---------------|--------------------|--------------------------------------------------------------------------------------------|----------------|------------------------|-----------|
| Map24 $\alpha$           | PLCB3   | PLCB3:chr11:64267452   | G to A        | G to A             | F-CCTGTGATGCCATCCTTCTC<br>R-AAGCATTAGTGTCAATGCCTCTG                                        | p.D1201N       | Missense Mutation      | nonsilent |
| Map24 $\alpha$           | PACS1   | PACS1:chr11:66070590   | A to C        | A to C             | F-GGAAGCTGGGAGCCAGATC<br>R-ATGGAGGTGGAGGTAGACGAGGAC                                        | p.Q35P         | Missense Mutation      | nonsilent |
| Map24 $\alpha$           | OTOP1   | OTOP1:chr4:4197744     | C to T        | C to T             | F-ATGGAGTAGGGCAGGTTGTACCAG<br>R-CATTGCTGTGGTGGTATACC                                       | p.A364T        | Missense Mutation      | nonsilent |
| Map24 $\beta$            | CDKN1A  | CDKN1A:chr6:36684429   | A insertion   | A insertion        | F-ACTTTGTCCAGGACACCACTG<br>R-TCTGGTCCCTTACAAAGTCTTC                                        | p.H110fs       | Frame Shift Ins        | null      |
| Map24 $\beta$            | APC     | APC:chr5:112839465     | C to T        | C to T             | F-GCTCCATCAAGTTCTGCACAGAg<br>R-CAGTCTGCTGGATTGGTCTAGG                                      | p.Q1291*       | Nonsense Mutation      | null      |
| Map24 $\beta$            | FBXW7   | FBXW7:chr4:152337818   | G to C        | G to C             | F-TGGCAATTTATCAATTTACAGCCCTC<br>R-TTGATAGAGCTGGAGTGGACCAG                                  | p.S202*        | Nonsense Mutation      | null      |
| Map24 $\beta$            | BRAF    | BRAF:chr7:140781611    | C to T        | C to T             | F-ATGCGAACAGTGAATTTCTCTTTG<br>R-CTGTATCCCTCTCAGGCATAAGG                                    | p.G466E        | Missense Mutation      | nonsilent |
| Map24 $\beta$            | RCC1    | RCC1:chr1:28532243     | C to T        | C to T             | F-GAAATGGAGCTGGCTAGTCAAGTG<br>R-CAGACTTTCAGACCCAGCCTTACC                                   | p.P112S        | Missense Mutation      | nonsilent |
| Map19 $\alpha$           | ZMIZ1   | ZMIZ1:chr10:79292307   | T to A        | T to A             | F-TGCAGGCAGTACCTAACTCTCCA<br>R-CCATAAGCACTGACATCCCAACTC                                    | p.V303E        | Missense Mutation      | nonsilent |
| Map19 $\alpha$           | ERCC2   | ERCC2:chr19:45364429   | C to G        | C to G             | F-GTTTTCTACTCTGGGCTAAGG<br>R-TTCGGGGTGTGGGAAGCTG                                           | p.N238S        | Missense Mutation      | nonsilent |
| Map19 $\beta$            | KDM6A   | KDM6A:chrX:45063557    | C to T        | only T             | F-AGATGAGACCAACAGGAGTTGCAC<br>R-GCAGTTTCCATTACTTCCACTTCC                                   | p.Q555*        | Nonsense Mutation      | null      |
| Map19 $\beta$            | FBXW7-2 | FBXW7:chr4:152352482   | C to T        | C to T             | F-AGAATACCAGACATCCAGCCACC<br>R-CCGGTTCTGCTCCCTAATCTCC                                      | p.M83I         | Missense Mutation      | nonsilent |
| Map19 $\beta$            | CDKN2A  | CDKN2A:chr9:21971210   | T to A        | T to A             | F-ACCAGCGTCCAGGAAGC<br>R-GGAACTGGAAGCAAATGTAGGGG                                           | NA             | Splice Site            | null      |
| Map19 $\beta$            | KMT2C   | KMT2C:chr7:152167145   | C to T        | C to T             | F-GGTCTCAGAGCTGCACTTTTGG<br>R-TGAAGAACAATGGTCTCACAG                                        | NA             | Splice Site            | null      |
| Map19 $\beta$            | SMARCA4 | SMARCA4:chr19:10984249 | G to A        | G to A             | F-CAGACTGACCAGGACTGTCTTCC<br>R-ATCCCTACCTTGTGCATCTGGTG                                     | p.G33D         | Missense Mutation      | nonsilent |
| <b>Founder mutations</b> |         |                        |               |                    |                                                                                            |                |                        |           |
| Map24 $\beta$            | BAP1    | BAP1:chr3:52403766     | G to C        | G to C             | F-CTGCTAGTCTTGATGGACAGGAATT<br>R-CCCTTGCTTACATCTTCTCG                                      | p.S460*        | Nonsense Mutation      | null      |
| Map19 $\beta$            | CAPRN1  | CAPRN1:chr11:34089401  | C to G        | C to G             | F-GTTTTGGTCACTTTGAGTTCATT<br>R-AGTGATCTCCCATCTCAGC<br>B-TTGCAGTTCATTCTGAATCTAGACTTGCTCAAAA | p.S413C        | Missense Mutation      | nonsilent |

F-forward primer; R-reverse primer; B-blocking primer
